# Supplementary material
Source: Royal Society of Chemistry journal article supplement (doi:10.1039/d6ee00569a)
Supplement: d6ee00569a1.pdf [file d6ee00569a1.pdf]

## Supporting Information

### **Beyond electronic effects: hydrogen-bond engineering via N-mediated microenvironment control for accelerated oxygen electroreduction**

Wenhui Jiang,<sup>a</sup> Bingyu Huang,<sup>a</sup> Zhi Cai,<sup>a</sup> Binbing Tang,<sup>b</sup> Dirk Lützenkirchen-Hecht,<sup>c</sup> Kai Yuan,<sup>\*a</sup> Yiwang Chen<sup>\*a,d</sup>

a. College of Chemistry and Chemical Engineering/Film Energy Chemistry for Jiangxi Provincial Key Laboratory (FEC)/Institute of Polymers and Energy Chemistry (IPEC); Nanchang University, Nanchang 330031, China

E-mail: kai.yuan@ncu.edu.cn (K. Yuan), ywchen@ncu.edu.cn (Y. Chen).

b. School of Physics and Materials Science, Nanchang University, Nanchang 330031, China.

c. Faculty of Mathematics and Natural Sciences-Physics Department, Bergische Universität Wuppertal, D-42119 Wuppertal, Germany.

d. College of Chemistry and Chemical Engineering, Gannan Normal University, Ganzhou 341000, China.

## **Experimental Procedures**

### **Materials and methods**

#### **Materials**

Pyrazine-2,5-dicarbaldehyde (PZ-CHO, 95%) and pyridine-2,5-dicarbaldehyde (PD-CHO, 97%) were purchased from Bide Pharmatech Ltd. 1,4-phthalaldehyde (BDA, 98%), pyrrole (99%), trifluoroacetic acid (TFA, 99%) and nitrobenzene (NBZ, 99%) were purchased from Energy Chemical Co. Ltd. Potassium hydroxide (KOH) was purchased from Sinopharm Chemical Reagent Co. Ltd (China). Propionic acid was bought from Alfa Aesar. BLACK PEARLS 2000 (BP2000) was purchased from Cabot Corporation. Carbon paper was obtained from Hesen Electric Inc. Shanghai. Zinc foil was obtained from Tengfeng Metal Co., Ltd. All the reagents and solvents are analytical grade and used without further purification.

#### **Materials Synthesis**

##### **Preparation of PZ-POP-Co**

First, pyrazine-2,5-dicarbaldehyde (28 mg, 0.2 mmol) was dissolved into a mixture solution with 5 mL propionic acid, 20  $\mu$ L TFA, and 10  $\mu$ L NBZ under ultrasonic treatment for 30 min to form a homogenous suspension. After that, 32  $\mu$ L pyrrole was added, then the as-obtained mixture was kept at 130 °C under constant magnetic stirring condition for 2 h to form a porphyrin-based polymer skeleton. The cobalt acetate equivalent to porphyrin moiety was dispersed in 6 mL propionic acid and added dropwise to the above solution under stirring. The mixture was kept at 130 °C for another 22 h, then cooled to room temperature (~25 °C) to provide a dark suspension. The suspension was filtrated, then washed with chloroform, deionized water and ethanol to remove unreacted reagents and porphyrin molecules. After vacuum drying at 60 °C overnight, the product (10 mg) and BP2000 (10 mg) were well mixed by grinding in agate mortar containing agate balls and 1 mL methanol under air atmosphere. The grinding bowl was later set into the ball mill and revolved for 12 h at 300 rpm. After separating the grinding beads, the obtained PZ-POP-Co was washed with deionized water and ethanol for three times. After vacuum drying at 60 °C overnight, PZ-POP-Co nanocomposite was obtained.

## **Preparation of PD-POP-Co and BDA-POP-Co**

As comparison, PD-POP-Co and BDA-POP-Co were prepared using a similar synthesis process as PZ-POP-Co, but replacing pyrazine-2,5-dicarbaldehyde with pyridine-2,5-dicarbaldehyde and 1,4-phthalaldehyde, respectively.

## **Instrumentations**

SEM measurements were performed via a scanning electron microscope (JEOL JSM-7900F). TEM images, HRTEM images, SAED patterns, EDS and HAADF STEM were obtained by employing a scanning transmission electron microscope (JEOL, JEM-2100F). The AC HAADF-STM measurement was performed by a scanning transmission electron microscope (Titan Cubed Themis G2 300). FT-IR spectra were recorded on a Thermo Scientific Nicolet 6700. The nitrogen adsorption-desorption measurements were performed on an Autosorb iQ (Anton-Paar China), and the specific surface areas were obtained by the BET model. XRD patterns were obtained by a Bruker 102 D8Discover 25 X-ray diffractometer. XPS spectra were recorded on a Kratos AXIS Ultra using monochromatized Al $\alpha$ -radiation. Zeta potential measurements were performed on a NanoBrook 90Plus PALS (Brookhaven Instruments Corporation, USA) at 25 °C. Ultraviolet-visible (UV-vis) absorption spectra were recorded on an Agilent series UV-vis-NIR spectrophotometer. Fluorescent quantum lifetimes were measured by fluorescence lifetime system (Light-Stone Instruments NTASTCSPC). Magnetic susceptibility was measured in a Quantum Design PPMS-9T.

## **Electrochemical measurements**

Electrochemical characterization was performed on AutoLab PGSTAT302N1 with PINE AFMSRCE. The electrocatalyst was loaded on a rotating disk electrode (RDE) (disk area: 0.196 cm<sup>2</sup>) or a rotating ring-disk electrode (RRDE) (disk area: 0.1866 cm<sup>2</sup>, ring area: 0.2475 cm<sup>2</sup>) as working electrode. Graphite rod was used as counter electrode, Ag/AgCl electrode and 0.1 M KOH aqueous solution were used as counter electrode, reference electrode and electrolyte, respectively. Before each test, the electrocatalyst ink was prepared by sonicating a mixture of 5 mg electrocatalyst, 500  $\mu$ L isopropyl alcohol, and 50  $\mu$ L of 5 wt% Nafion solution for 1 h. Next, 10  $\mu$ L of the catalyst ink was deposited on a glassy carbon electrode and dried at room

temperature. Linear sweep voltammetry (LSV) curves were recorded at 225–2025 rpm with a sweep rate of 10 mV s<sup>-1</sup> using RDE. All LSV measurements were performed with automatic iR compensation set at 85% to minimize ohmic drop and ensure accurate potential reporting. The electron-transfer number (*n*) was calculated from the Koutecky-Levich (K-L) equation, which is expressed as follows:

$$\frac{1}{j} = \frac{1}{j_L} + \frac{1}{j_K} = \frac{1}{B\omega^2} + \frac{1}{j_K}$$

Here, *j* is the measured current density, *j<sub>K</sub>* and *j<sub>L</sub>* are the kinetic-limiting and diffusion limiting current densities, respectively, *ω* is the electrode rotating speed in rad s<sup>-1</sup>, the K-L plots (*ω*<sup>-1/2</sup> vs *j*<sup>-1</sup>) in O<sub>2</sub>-saturated 0.1 M KOH can be come from LSV curves at various rotation speeds. *B* can be determined from the slope of K-L plots as given by

$$B = 0.62nFC_0(D_0)^{2/3}\nu^{-1/6}$$

where *F* is the Faraday constant (*F*= 96485 C mol<sup>-1</sup>), *C<sub>0</sub>* is the bulk concentration of O<sub>2</sub> in 0.1 M KOH (1.2 × 10<sup>-6</sup> mol cm<sup>-3</sup>), *D<sub>0</sub>* is the diffusion coefficient of O<sub>2</sub> in 0.1 M KOH (1.9 × 10<sup>-5</sup> cm<sup>2</sup> s<sup>-1</sup>), and *ν* is the kinetic viscosity of 0.1 M KOH (0.01 cm<sup>2</sup> s<sup>-1</sup>).

The transferred electrons number (*n*) was determined by RRDE measurements. The HO<sub>2</sub><sup>-</sup> (%) and the *n* were calculated by the following equations:

$$\begin{aligned} (HO_2^-)\% &= \frac{200 \times I_{Ring}}{I_{Ring} + I_{Disk} \times N} \\ n &= \frac{4 \times I_{Disk}}{I_{Disk} + I_{Ring}/N} \end{aligned}$$

where *I<sub>D</sub>* is the disk current, *I<sub>R</sub>* is the ring current, and *N* (= 0.37) is the collection efficiency of RRDE.

The ECSA was determined by measuring the capacitive current associated with double-layer charging from the scan rate dependence of the CV. This measurement was performed on the same working electrode in a potential window of 1.00-1.10 V vs. RHE and scan rates ranging from 1.0 to 10.0 mV s<sup>-1</sup>. Then, linear fitting of the charging current density differences ( $\Delta j = j_a - j_c$  at a potential of 1.05 V vs. RHE) against the scan rate was done. *j<sub>a</sub>* and *j<sub>c</sub>* represent the anodic and cathodic current densities, respectively. The slope is twice the double layer capacitance *C<sub>dl</sub>*. ECSA was calculated using  $ECSA = R_f / m_{loading}$ , where *m<sub>loading</sub>* is the loading

mass of catalyst per geometrical area of the electrode.  $R_f = C_{dl}/40 \mu\text{F cm}^{-2}$  (the average specific capacitance of a flat standard electrode with 1 cm<sup>2</sup> of real surface area is 40  $\mu\text{F cm}^{-2}$ ). The EIS measurements were recorded in the frequency range from 100 kHz to 0.1 Hz with an AC signal amplitude of 10 mV in an N<sub>2</sub>- saturated 0.1 M KOH electrolyte.

### **Electrochemical impedance spectroscopy (EIS) and distribution of relaxation times (DRT) analysis**

EIS tests were performed on the AutoLab (PGSTAT302N1). Operando EIS for ZABs was carried out from 100 kHz to 0.05 Hz under different discharge current densities, with 10 points per decade and 2 mA amplitude. DRT was calculated based on EIS data (discarding inductive data) by MatlabR2022 with a freely available toolbox of *DRT-TOOLS* developed by Prof. Francesco Ciucci's team.<sup>1</sup> The regularization parameter  $\lambda$  is set to 10<sup>-3</sup>, and the Full Width at Half Maximum (FWHM) factor is 0.5.

### **O<sub>2</sub> adsorption capability assessment**

The oxygen adsorption capacity of as-prepared catalysts was accessed by chronoamperometry. Two electrolytic cells were filled with 0.1 M KOH, one was saturated with O<sub>2</sub>, while the other was purged with N<sub>2</sub> to remove dissolved oxygen. The working electrode loaded with catalyst was first immersed in the O<sub>2</sub>-saturated electrolyte to adsorb oxygen on active sites. It was then quickly transferred to the O<sub>2</sub>-free electrolyte, chronoamperometry was performed at an applied potential of 0.4 V<sub>RHE</sub>, where the adsorbed O<sub>2</sub> can be consumed. Control experiments were performed between two O<sub>2</sub>-free electrolytic cells to eliminate capacitive contributions. The chronoamperometric *I-t* curves with “-O<sub>2</sub><sup>ad</sup>” suffix represent for oxygen adsorption tests, and those with “-N<sub>2</sub>” suffix represent for control experiments. The O<sub>2</sub> adsorbance was calculated by following equation:

$$Adsorbance = \frac{Q_{-O_2^{ad}} - Q_{-N_2}}{F \times n \times m_{cat.}}$$

where  $Q_{-O_2^{ad}}$  and  $Q_{-N_2}$  is the integrated charge of chronoamperometric  $I-t$  curves with corresponding suffix.  $F$  is Faraday's constant (96485 C mol<sup>-1</sup>).  $n$  is the average electron transfer number calculated from RRDE tests. The  $n$  of carbon black (CB) was assumed to be 4.

### The measurement method for PZC.

Differential capacitance was measured to obtain the PZC of working electrodes using AutoLab PGSTAT302N1 with PINE AFMSRCE. The frequency range was 10<sup>5</sup> Hz-0.05 Hz, and the amplitude was 5 mV. The double-layer capacitance ( $C_{dl}$ ) was calculated from the constant phase element (CPE) parameters and the two resistances using the following Brug formula:

$$C_{dl} = T^{\frac{1}{P}} \left( \frac{1}{R_s} + \frac{1}{R_{ct}} \right)^{\frac{P-1}{P}}$$

where  $R_s$  is the solution resistance,  $R_{ct}$  is the charge transfer resistance,  $T$  is the CPE constant, and  $P$  is the CPE exponent. We used the equivalent circuit of Figure S28 to simulate the experimental data points. The relevant parameter values were fitted by ZView2 software.

### Proton conductivity measurement.

Proton conductivity of the X-POP-Co were carried out via the AC electrochemical impedance spectroscopy method with a frequency from 0.1 Hz to 7 MHz and an amplitude of 10 mV at a potential of 0 mV (vs. RHE), using a CHI660E workstation. About 30 mg of X-POP-Co were pressed into circular pellets (16 mm in diameter, 0.2 mm in thickness) under a pressure of 5 MPa for 5min.

The semicircle with characteristic strays at low frequencies indicates the blocking of protons at the electrode. Proton conductivity was calculated by using the following formula:

$$\sigma = \frac{L}{Z \times d \times w}$$

where  $\sigma$  is the conductivity (S cm<sup>-1</sup>),  $L$  is the thickness of the measured plate (cm),  $Z$  is the measured impedance ( $\Omega$ ),  $d$  is width of electrodes overlap area, and  $w$  is the width of electrode.

The activation energy ( $E_a$ ) is calculated by using the conductivity data at 98% RH with the Arrhenius equation:

$$\ln(\sigma T) = \ln A - \frac{E_a}{k_B T}$$

where  $k_B$  and  $A$  are the Boltzmann constant and the pre-exponential factor, respectively.

### Scanning electrochemical microscope (SECM)

The SECM measurements were performed on a CHI920D, including a bipotentiostat and a high-resolution 3D electrode positioner. The probe was a CHI116 10  $\mu\text{m}$  Pt SECM tip. The substrate was a homemade concave Au electrode with a recessed microdisk with diameter of 25  $\mu\text{m}$  at the depth of  $\sim 7$   $\mu\text{m}$ . An Ag/AgCl electrode was used as reference electrode. A Pt wire was used as counter electrode. The electrolyte was Ar-saturated 0.1 M KOH aqueous solution with 0.5 mM FcMeOH.

The processing of substrate was following the literatures. In brief, a 25  $\mu\text{m}$  Au wire was inserted into a glass capillary tube (outer diameter of 2.2 mm), then heating with an oxyhydrogen flame to sealing the Au wire into the tube. A copper wire was attached on one side of Au wire by silver conductive paint. The end of the capillary containing the sealed Au wire is polished flat with successively finer grit sandpaper (400-, 600-, 800-, 1000-, 3000-grit) until the exposure of Au surface. Then the polished electrode was electrochemically etched in the  $\text{CaCl}_2$  solution to dig a cavity. An optical microscope was used to check the sealing and the depth of cavity. To load catalysts into concave electrode, catalyst powder was spread onto the surface of glass slide. Then, gently pressing the concave electrode onto the catalyst powder along vertical direction, and wiping the residuals with a lens wiping paper. An optical microscope was used to check the loading and flatness. The procedure may repeat several times, until the cavity is filled with catalyst powder.

Probe approach curve technique was used to positioning z axis and adjusting platform. The probe was biased at 0.5  $V_{\text{Ag}/\text{AgCl}}$  to oxidize FcMeOH to  $\text{FcMeOH}^+$ . When the probe approaching very close to the surface of substrate, the feedback current will be greatly changed due to the restricted diffusion. A cut off set at a current level of 75 % to avoid crash. A quiet time set for 20 s to steady current value. The adjustment of platform was based on three-point fix method. SECM technique was used to locating the catalyst region. The probe was biased at 0.85  $V_{\text{Ag}/\text{AgCl}}$  and the substrate was biased at - 0.9646  $V_{\text{Ag}/\text{AgCl}}$ . Firstly, a  $500 \times 500$   $\mu\text{m}$  scan (5  $\mu\text{m}/\text{step}$ ) was performed for rough locating. Subsequently, a  $200 \times 200$   $\mu\text{m}$  scan (2  $\mu\text{m}/\text{step}$ ) was performed for fine positioning. The probe returned back to origin when the measurement finished. A quiet time set for 20 s to steady current value. The TG/SC mode SECM images were recorded on this

200 × 200 μm region, but changing a series of the given substrate bias potential ranged from -0.9646 V<sub>Ag/AgCl</sub> to -0.0646 V<sub>Ag/AgCl</sub>.

### Surface-interrogation (SI-) SECM measurement

The SI-SECM was performed on the same platform as SECM. Firstly, the  $C_{dl}$  was measured by a series of CV scanning in a non-Faradaic potential (0.05 - 0.15 V vs. RHE) at given scan rates of 10, 20, 30, 40, 50 mV s<sup>-1</sup>. The ECSA<sub>UME</sub> (subscript UME is to declare the data obtained from ultra-micro electrode) was determined by the same procedure as described in previous electrochemical measurements section.

Subsequently, the Pt tip was electrochemically cleaned by CV cycling from -0.9646 V<sub>Ag/AgCl</sub> to -0.4646 V<sub>Ag/AgCl</sub> at 50 mV s<sup>-1</sup> for ~300 s. Then, the probe was switched to open circuit and the substrate was subject to given bias potential from -0.9646 V<sub>Ag/AgCl</sub> to 0.2354 V<sub>Ag/AgCl</sub> for 30 s. After that, the substrate was immediately switched to open circuit, while the probe was biased at 0.4 V<sub>Ag/AgCl</sub> for 30 s. The feedback current at probe ( $I_{tip}$ ) was recorded. The electric quantity at tip ( $Q_{tip}$ ) was derived by background subtraction and integration of  $I_{tip}$ . The active site density (SD) was followed the relation as described by following equation:

$$SD = \frac{Q_{tip}/F \times N_A}{ECSA_{UME}}$$

where  $F$  represents the Faraday's constant (96485 C mol<sup>-1</sup>) and  $N_A$  is the Avogadro constant (6.02 × 10<sup>23</sup> mol<sup>-1</sup>).

The turnover frequency (TOF) was calculated by following equation:

$$TOF = \frac{N_A \times j_m}{SD_{mass} \times F}$$

The kinetic mass activity ( $j_m$ ) for the as-papered catalysts in this work is defined as:

$$j_m = \frac{j_K}{m_{catalyst}}$$

where  $m_{catalyst}$  is the catalyst loading on the glassy carbon disc (mg cm<sup>-2</sup>), the potential to determine kinetic current density ( $j_k$ ) is chosen at 0.8 V.

### XAFS measurements

X-ray absorption spectroscopy (XAS) experiments were carried out at the wiggler beamline BL10 at the DELTA storage ring (Dortmund, Germany) operated with 80-130 mA of 1.5 GeV

electrons. Co K-edge spectra were collected using a Si (111)-channel cut monochromator and gas-filled ionization chambers as detectors for the incoming and the transmitted intensities, and a large area photodiode for the fluorescence photons.

### **Laviron equation**

$$E_c = E_{1/2} - \left(\frac{RT}{\alpha nF}\right) \times \ln\left(\frac{RT}{RTk_s}\right) - \left(\frac{RT}{\alpha nF}\right) \times \ln(v)$$

where  $E_c$  is the reduction potential of metal redox,  $E_{1/2}$  is the formal potential of metal redox,  $R$  is the universal gas constant,  $T$  is the temperature in kelvin,  $n$  is the number of electrons transferred,  $\alpha$  is the transfer coefficient,  $k_s$  is the kinetic constant of metal redox, and  $v$  is the scan rate in the CV measurement.

### **VF-SWV measurements**

Square wave voltammetry tests were performed in N<sub>2</sub>-saturated 0.1 M KOH electrolyte with a step potential of 10 mV, amplitude of 25 mV. The perturbation frequency ( $f$ ) was varied from 1250 to 0.33 Hz.

### **Electron transfer reaction between catalysts and TCNQ**

5 mg of catalyst was exposed to 5 mL 7.65 mM TCNQ acetonitrile solution in a centrifuge tube through ultrasonic treatment, followed by stirring the suspension at 70 °C for 20 min to accelerate the electron transfer reaction. Subsequently, the supernatant is separated by centrifugation for further analysis by UV-vis absorption spectra. The original TCNQ solution was diluted 250-fold with acetonitrile before measurement. The TCNQ solution reacted with the catalyst and was diluted twofold with acetonitrile before the measurements.

### **Aqueous ZAB assembly and testing**

An in-house-developed aqueous ZABs were built and assembled to evaluate the electrochemical energy conversion performance of the composite materials. It was constructed by pairing X-POP-Co loaded onto a carbon paper (HCP020P, 0.19 mm thickness) with a Zn plate (0.20 mm thickness, 99.99% purity) in 6 M KOH (20 mL). The ZABs were assembled

applying the following procedure: First, the air electrodes were prepared by pipetting catalyst slurry carefully onto the carbon paper, the catalyst loading on carbon paper is  $\sim 120 \mu\text{g}$  ( $0.25 \text{ mg cm}^{-2}$ ). Subsequently, polished zinc plates served as the anode, zinc plates were manually polished with finer grit sandpaper (1000-, 2000-, 3000-grit) beforehand, followed by the sonication in deionized water for several minutes. Battery tests were carried out at room temperature ( $25 \text{ }^\circ\text{C} \pm 2 \text{ }^\circ\text{C}$ ) under a dry air atmosphere with a CHI 760E and a LAND CT2001A. The specific capacity and specific energy can be obtained from the consumed Zn after discharge.

Operando attenuated total reflection surface-enhanced infrared absorption spectroscopy (ATR-SEIRAS) was employed on a Thermo Scientific Nicolet iS50 with a liquid-nitrogen-cooled MCT detector. During the test, the catalyst was loaded onto the surface of a silicon prism with an Au film as the working electrode, Pt foil as the counter electrode and Ag/AgCl electrode as reference electrode, respectively. The test potential ranges from 0.4 to 1.0 V vs. RHE in  $\text{O}_2$ -saturated 0.1 M KOH solution.

### Computational Details

All the calculations are performed in the framework of the density functional theory with the projector augmented plane-wave method, as implemented in the Vienna ab initio simulation package.<sup>2-3</sup> The generalized gradient approximation proposed by Perdew-Burke-Ernzerhof (PBE) is selected for the exchange-correlation potential.<sup>4</sup> Electron spin polarization is taken into account in all calculations. The cut-off energy for plane wave is set to 450 eV. The energy criterion is set to  $10^{-5}$  eV in iterative solution of the Kohn-Sham equation. All the structures are relaxed until the residual forces on the atoms have declined to less than  $0.03 \text{ eV/\AA}$ . The Gamma scheme was utilized for Brillouin zone sampling, with a k-points mesh of  $3 \times 3 \times 1$ .

The ORR pathways, involving OOH, \*O, and \*OH intermediates, were examined by calculating adsorption energies. The reaction Gibbs free energy ( $\Delta G$ ) was evaluated by accounting for zero-point energy, enthalpy, and entropy terms. The standard reference for the free energy of  $\text{H}^+ + \text{e}^-$  was half the free energy of  $\text{H}_2$ .

$$\Delta G = \Delta E + \Delta ZPE - \Delta TS + \Delta G_U + \Delta G_{pH}$$

Here,  $e$  is the total system energy,  $ZPE$  denotes the zero-point energy, and  $S$  is the entropy. Zero-point-energy (ZPE) and entropy corrections were obtained from frequency calculations. The applied potential is represented by  $U$ , while  $\Delta G$  pH serves as the pH-dependent free-energy correction for  $H^+$ . Under alkaline conditions, the overall ORR can be written as:  $O_2 + 2H_2O + 4e^- \rightarrow 4OH^-$ . This reaction involves a series of elementary steps, commonly used to illustrate the ORR electrocatalytic process on active sites.

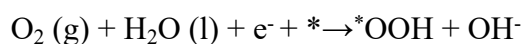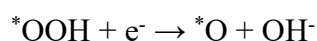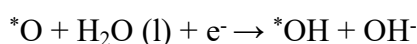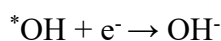

where  $*$  represents the active site on catalytic surface, (l) and (g) stand for liquid and gas phases, respectively.

Ab initio molecular dynamics (AIMD) simulation was carried out to study disorder structures. During geometry optimization, the cut-off energy was set as 300 eV for structures, respectively. The Brillouin zone was sampled by a Monkhorst-Pack (MP) k-point grid of  $1 \times 1 \times 1$  for geometry optimizations. The conjugated gradient method was applied with a smearing width of 0.2 eV, and the convergence criteria for the energy and force were  $10^{-5}$  eV/cell and  $0.05$  eV/Å, respectively. AIMD simulations were run for 2 ps as equilibration with time steps of 1 fs, performing a constant temperature of 300 K in the Nosé -Hoover isokinetic ensemble.

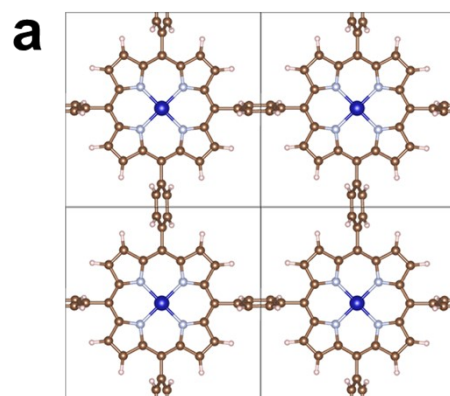

**BDA-POP-Co**

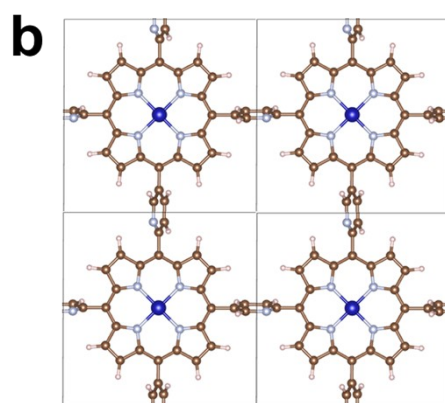

**PD-POP-Co**

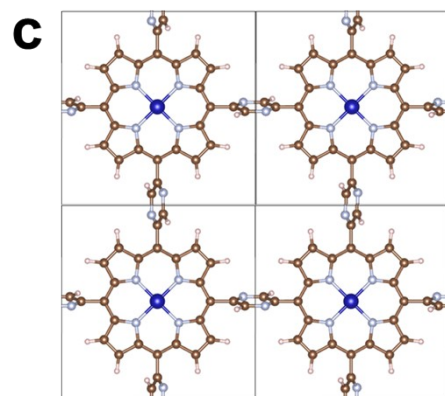

**PZ-POP-Co**

**Figure S1.** The theoretical computational models of (a) BDA-POP-Co, (b) PD-POP-Co and (c) PZ-POP-Co.

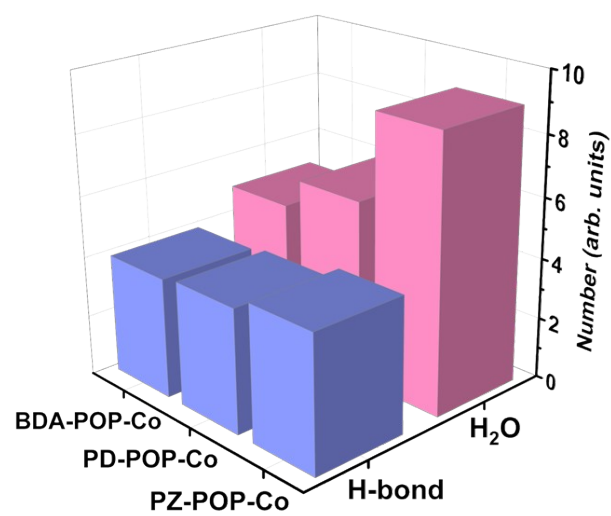

**Figure S2.** The average number of hydrogen bonds and corresponding H<sub>2</sub>O molecules at different catalysts' interface.

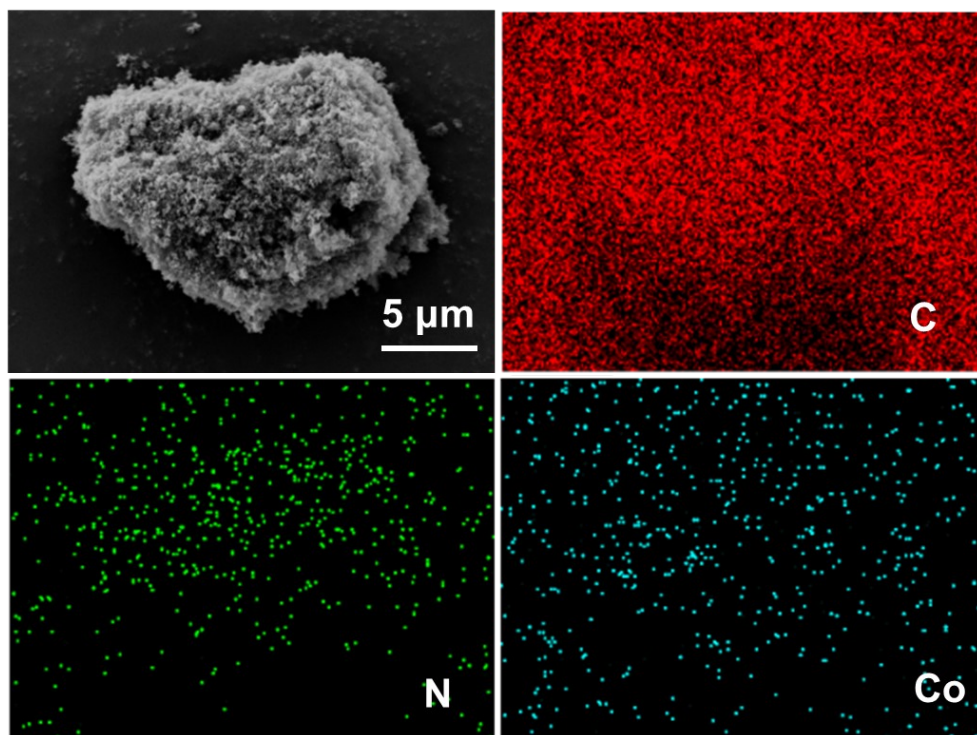

**Figure S3.** SEM image and corresponding EDS elemental mapping images of BDA-POP-Co.

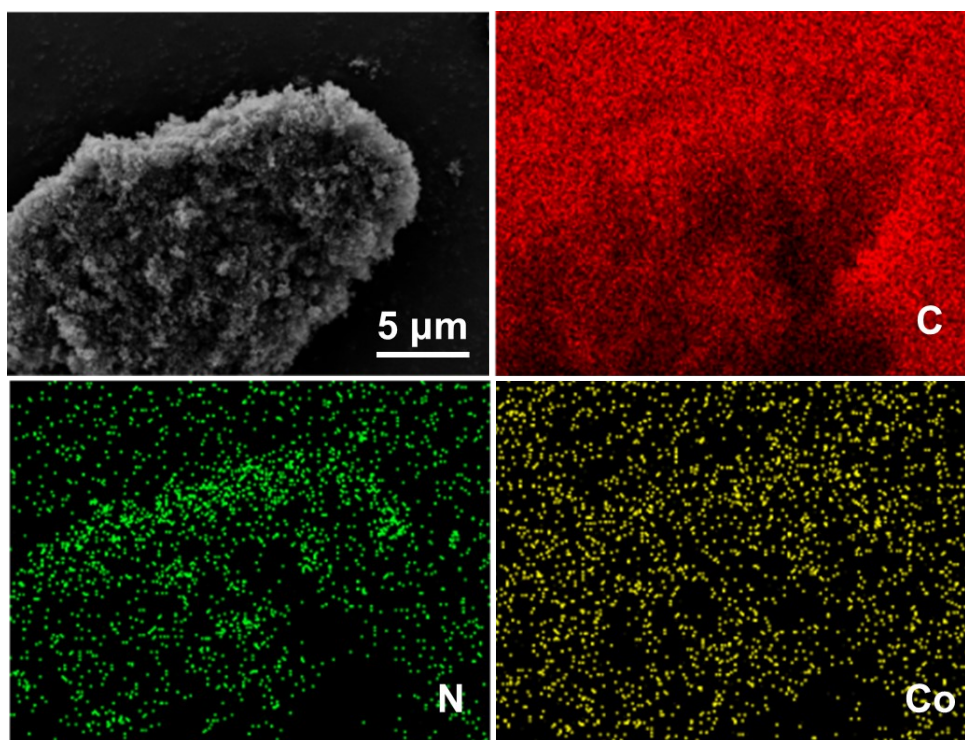

**Figure S4.** SEM image and corresponding EDS elemental mapping images of PD-POP-Co.

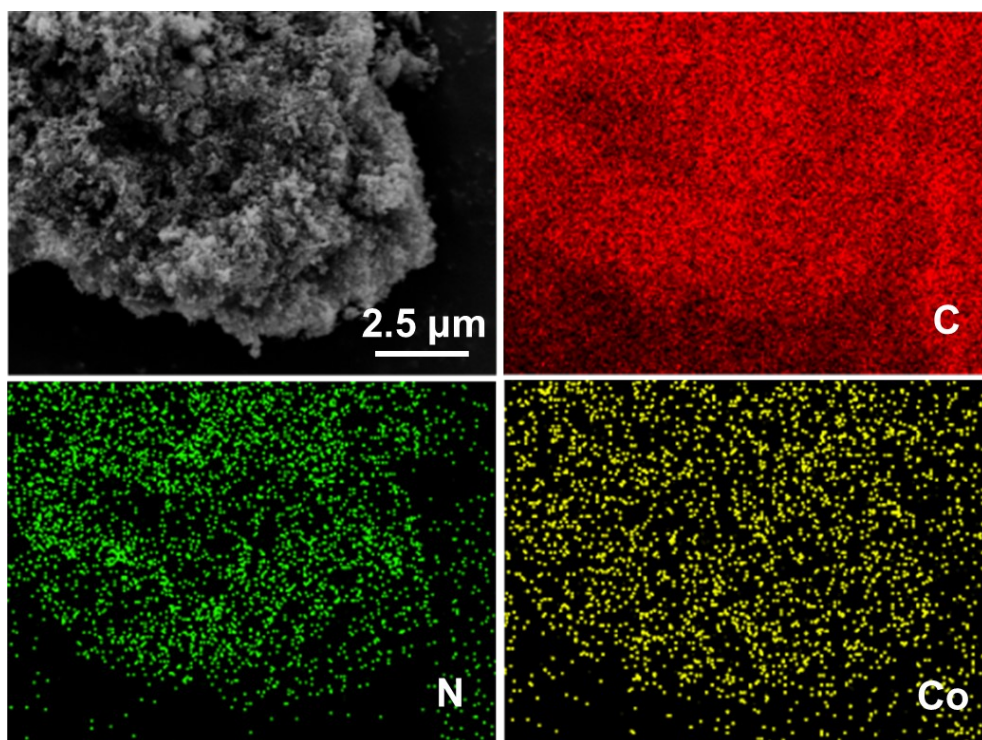

**Figure S5.** SEM image and corresponding EDS elemental mapping images of PZ-POP-Co.

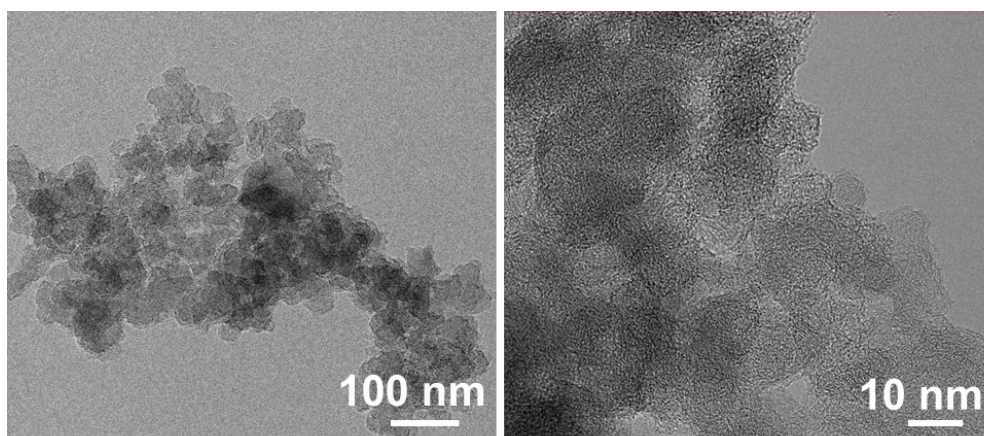

**Figure S6.** The TEM images with different magnifications of PZ-POP-Co.

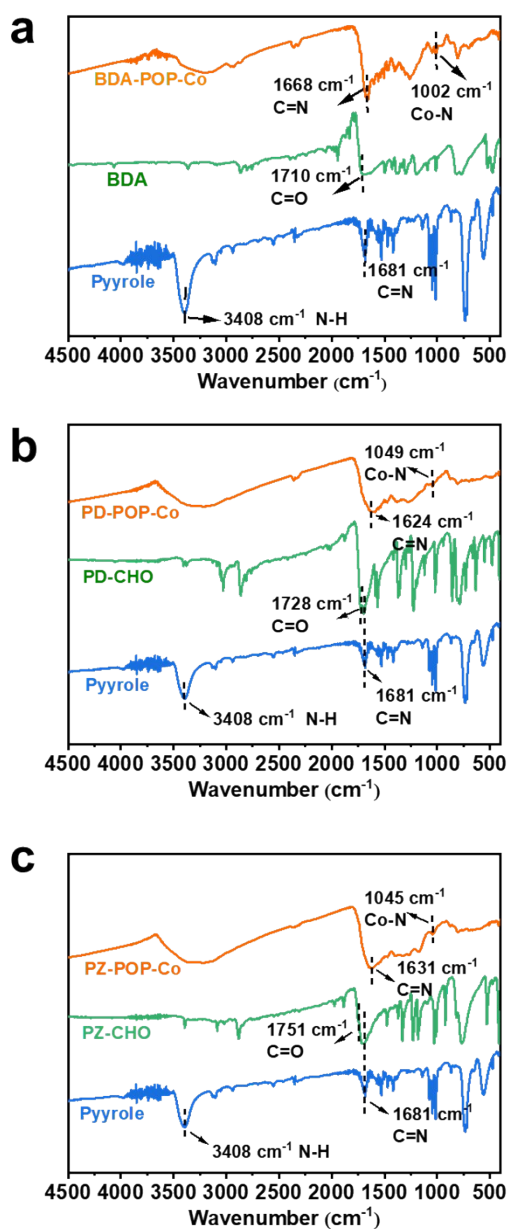

**Figure S7.** FT-IR spectra of **a** BDA-POP-Co, **b** PD-POP-Co, and **c** PZ-POP-Co and their monomers, including BDA, PD-CHO, PZ-CHO and pyrrole.

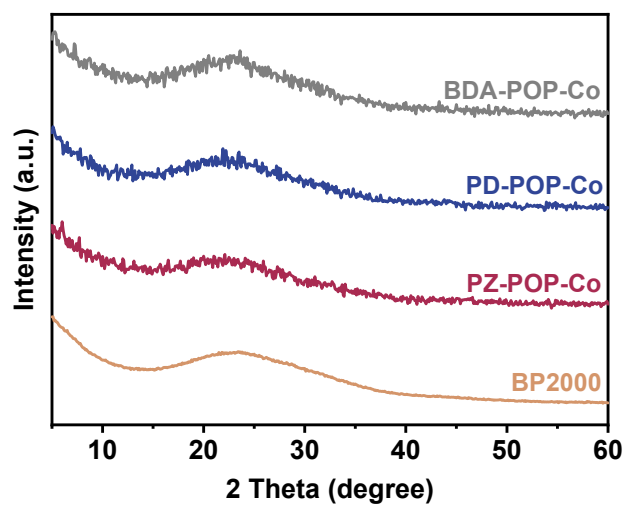

**Figure S8.** XRD patterns of BDA-POP-Co, PD-POP-Co, PZ-POP-Co, and BP-2000.

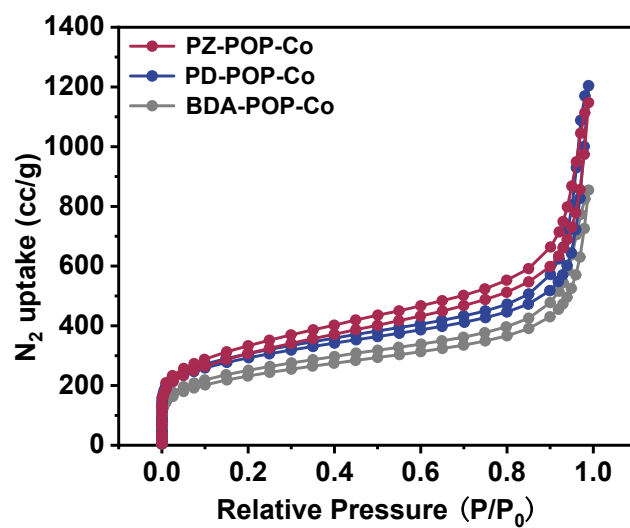

**Figure S9.** N<sub>2</sub> adsorption-desorption isotherms of X-POP-Co.

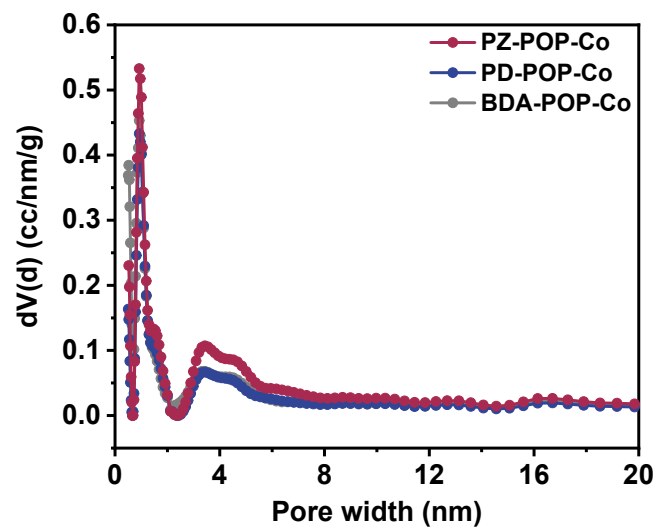

**Figure S10.** Pore size distribution profiles of X-POP-Co.

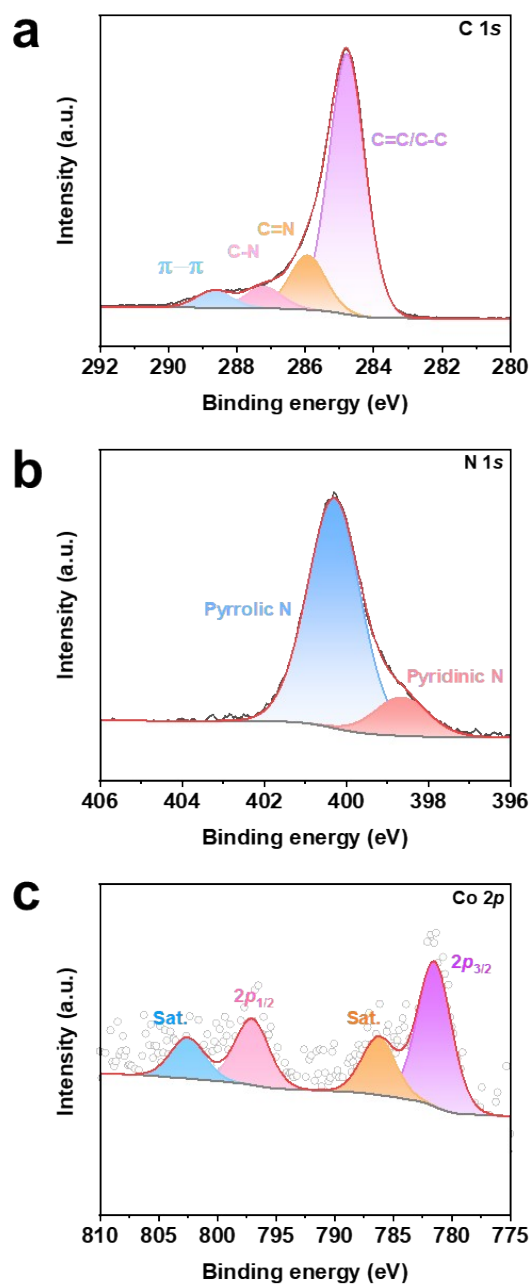

**Figure S11.** High-resolution **a** C 1s, **b** N 1s and **c** Co 2p XPS spectra of BDA-POP-Co.

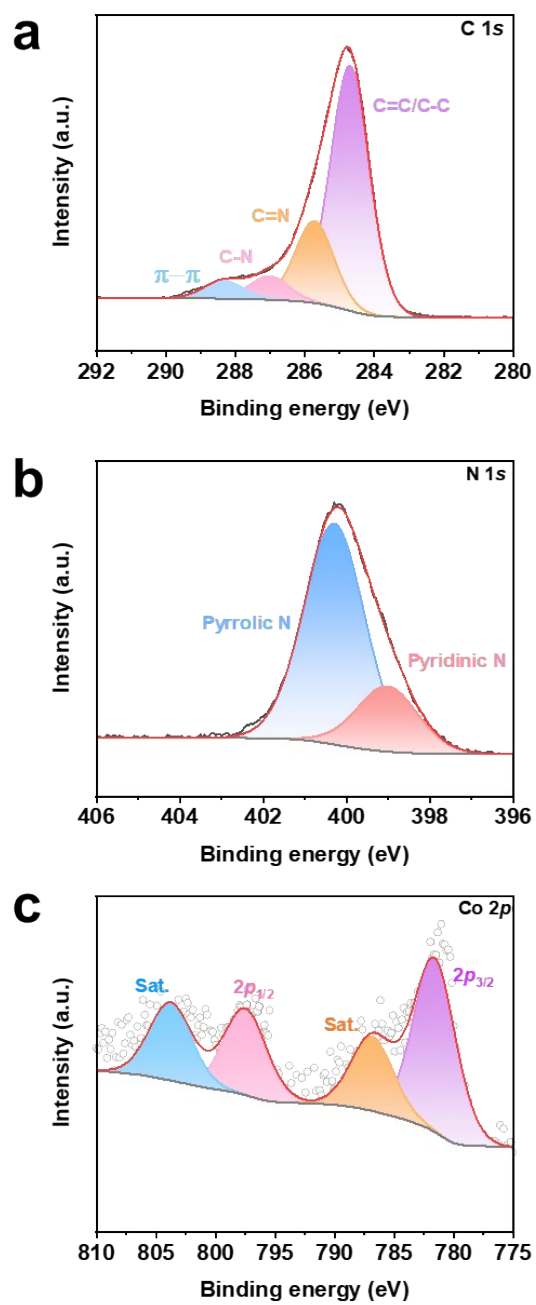

**Figure S12.** High-resolution **a** C 1s, **b** N 1s and **c** Co 2p XPS spectra of PD-POP-Co.

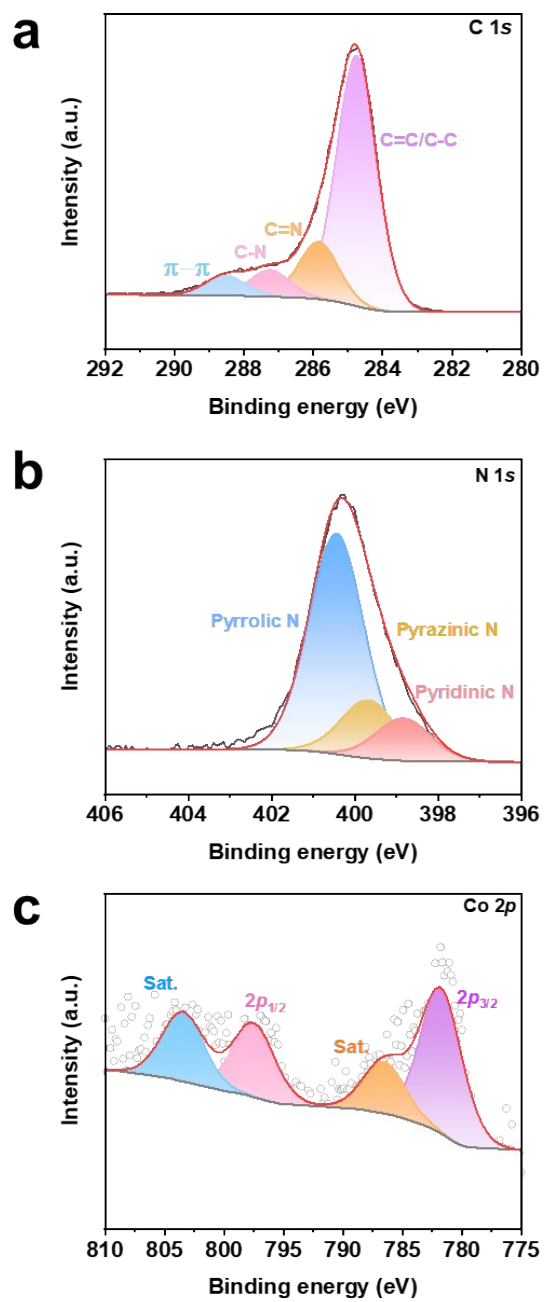

**Figure S13.** High-resolution **a** C 1s, **b** N 1s and **c** Co 2p XPS spectra of PZ-POP-Co.

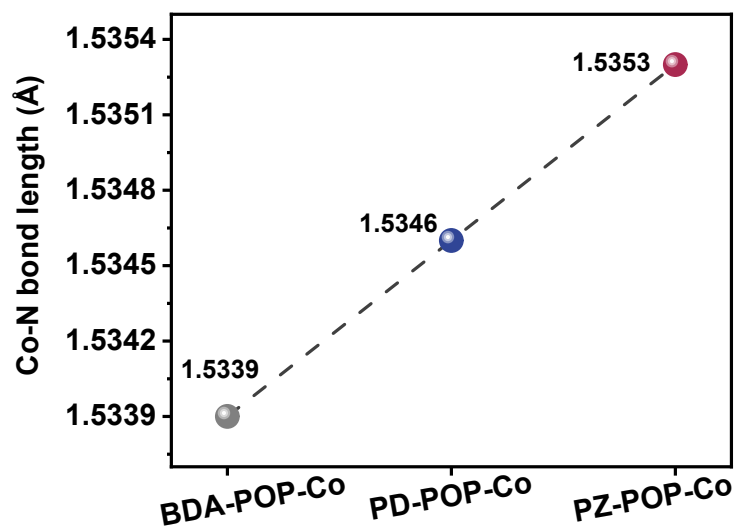

**Figure S14.** Co-N bond length for X-POP-Co.

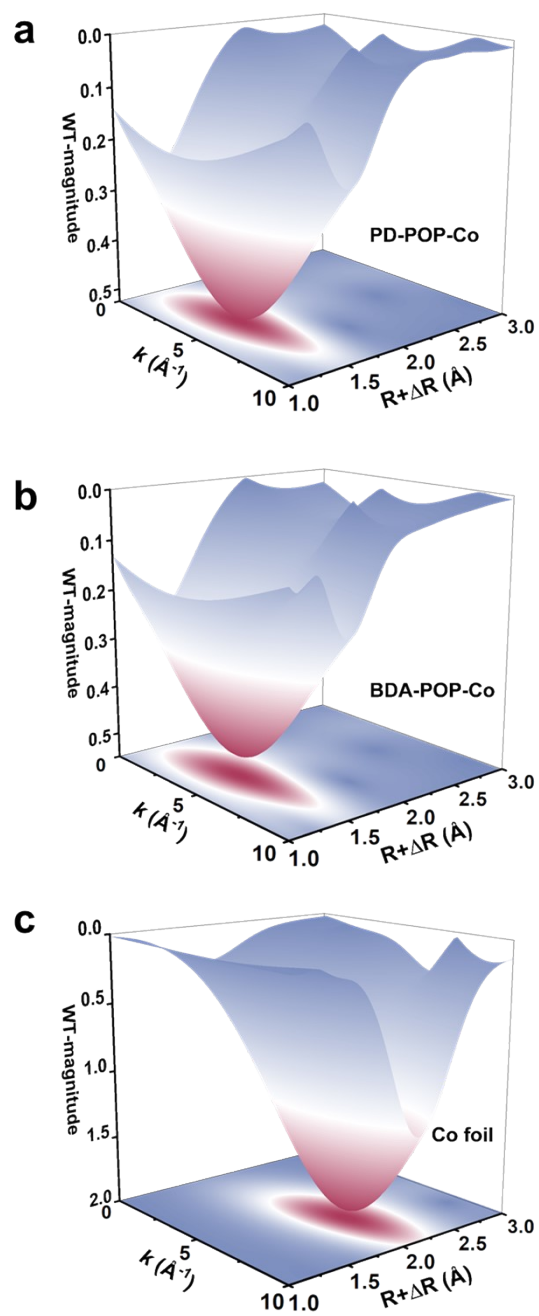

**Figure S15.** WT-EXAFS plots of **a** PD-POP-Co, **b** BDA-POP-Co and **c** Co foil.

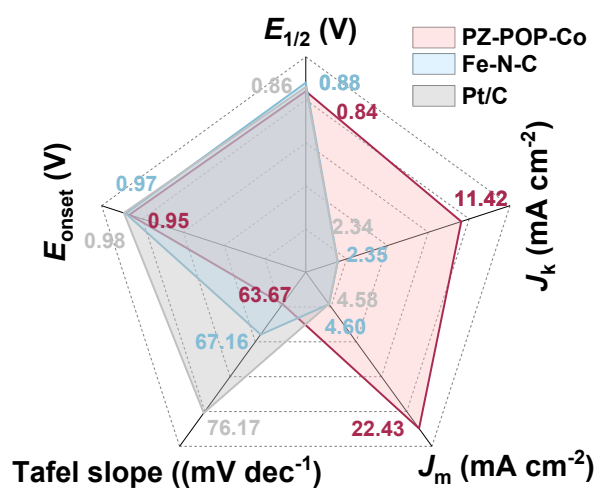

**Figure S16.** Comprehensive performance radar chart of  $E_{1/2}$ ,  $E_{\text{onset}}$ , Tafel slope,  $J_k$ , and  $J_m$  (at 0.80 V) for PZ-POP-Co, Fe-N-C and Pt/C.

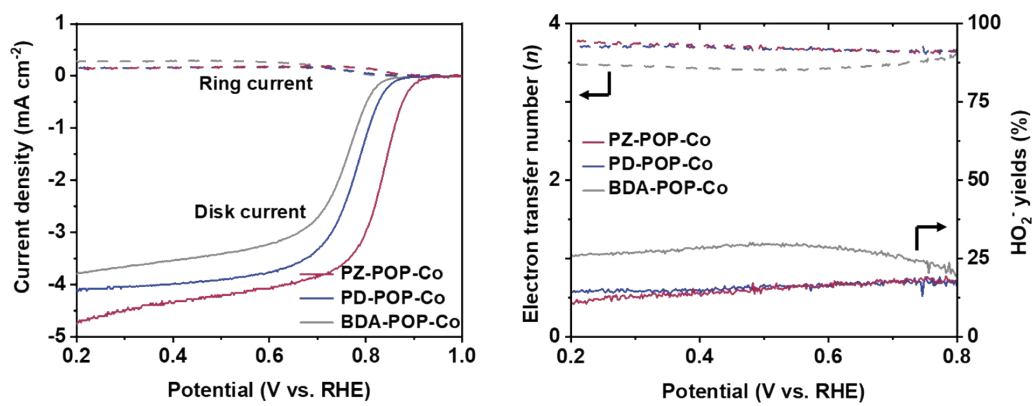

**Figure S17.** RRDE LSV curves and corresponding electron transfer number ( $n$ ) and HO<sub>2</sub><sup>-</sup> yield of X-POP-Co.

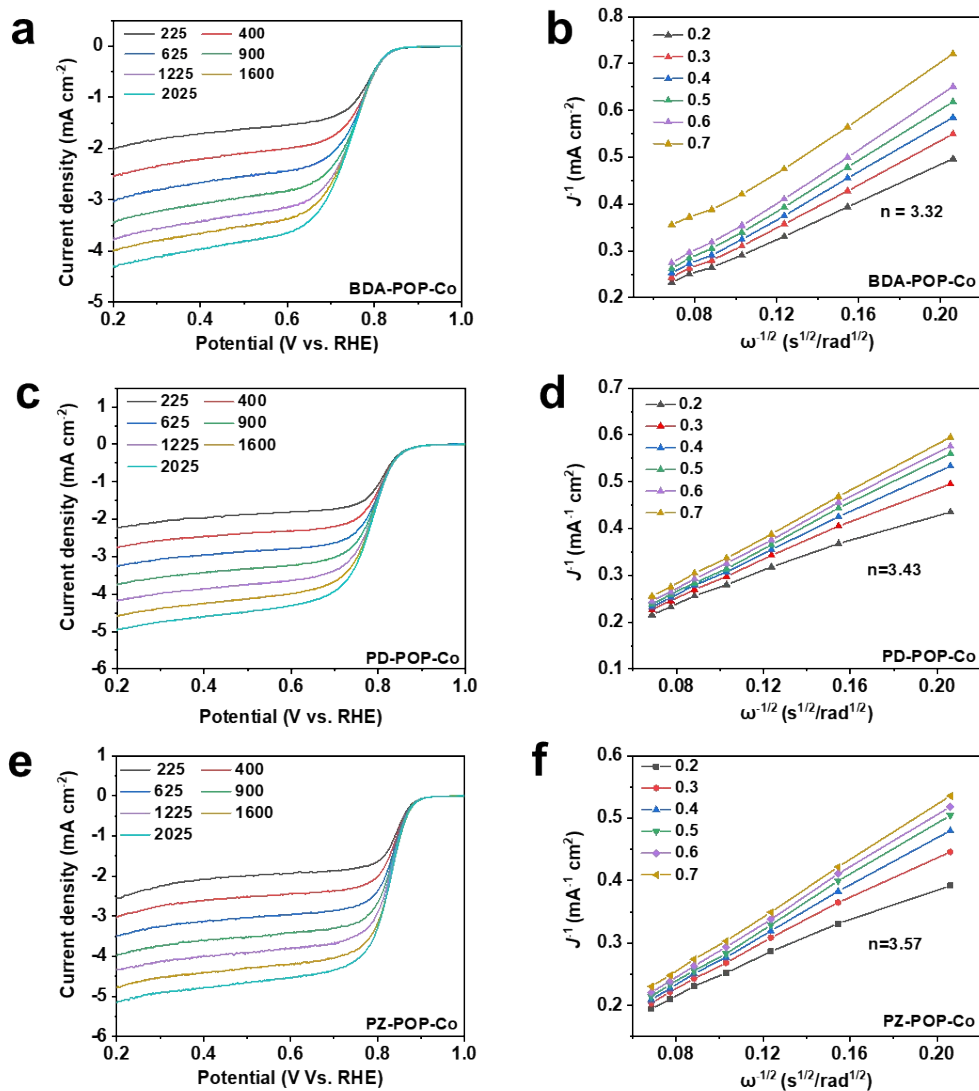

**Figure S18.** LSV curves at different rotation rates in 0.1 M KOH and corresponding K–L plots of **a, b** BDA-POP-Co, **c, d** PD-POP-Co, and **e, f** PZ-POP-Co.

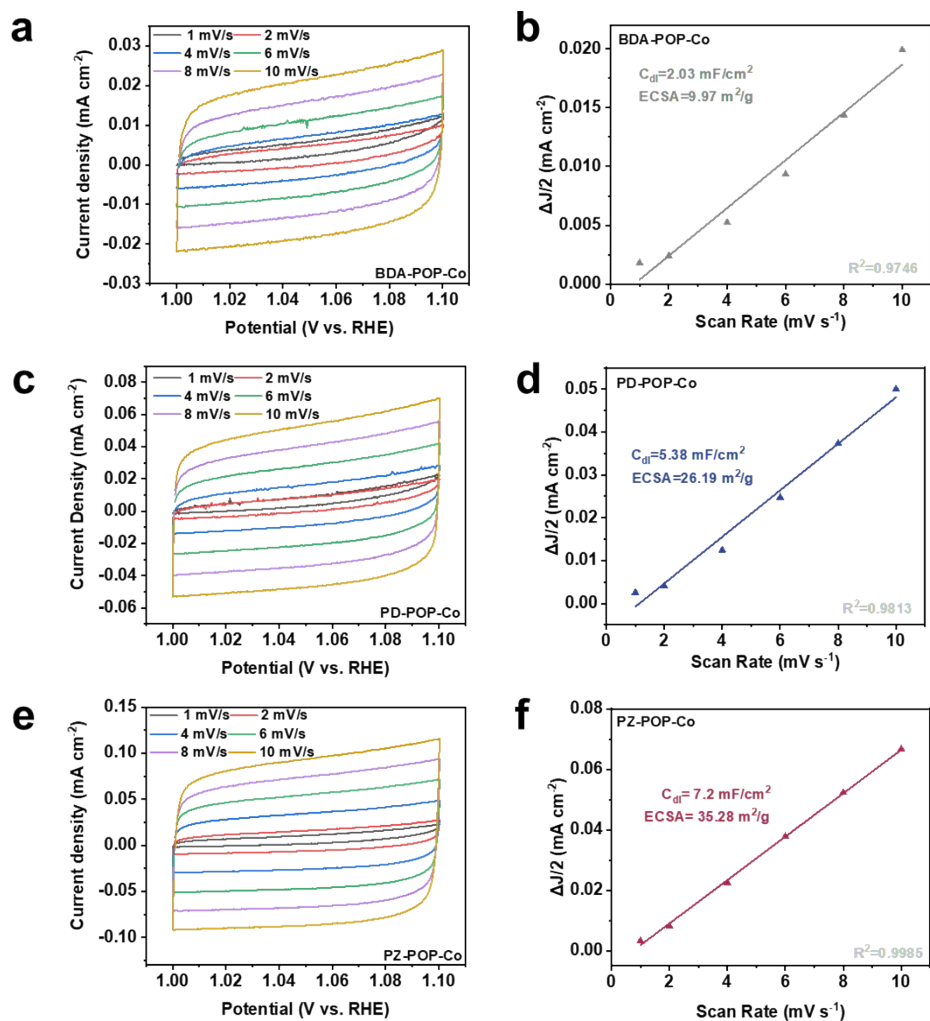

**Figure S19.** CV curves in the region of 1.0-1.1 V (vs. RHE) at various scan rates (left), the corresponding double-layer capacitance ( $C_{dl}$ ) and ECSA (right) of **a, b** BDA-POP-Co, **c, d** PD-POP-Co, and **e, f** PZ-POP-Co at room temperature ( $\sim 25$  °C).

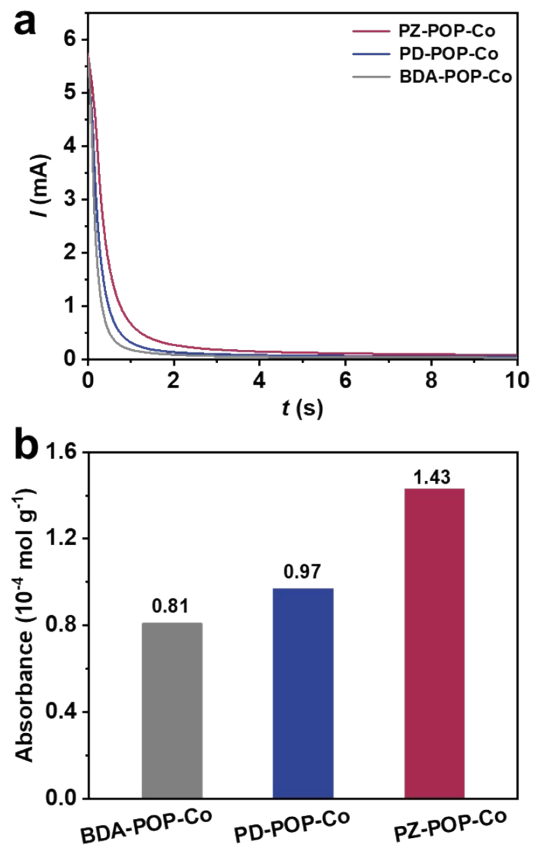

**Figure S20.** **a** Chronoamperometric  $I-t$  curves, and **b**  $O_2$  absorbance for X-POP-Co.

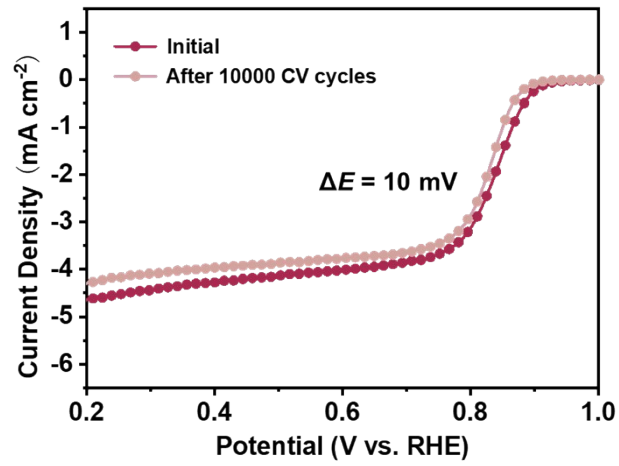

**Figure S21.** The LSV polarization curves of PZ-POP-Co before and after 10000 cycles.

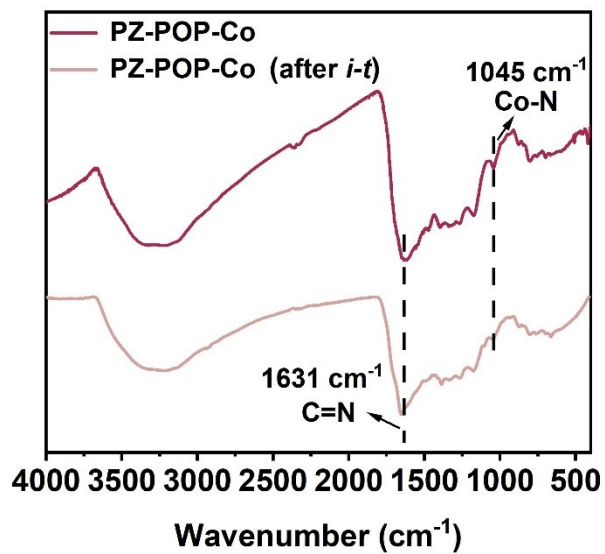

**Figure S22.** FT-IR spectra of PZ-POP-Co before and after *i-t* test.

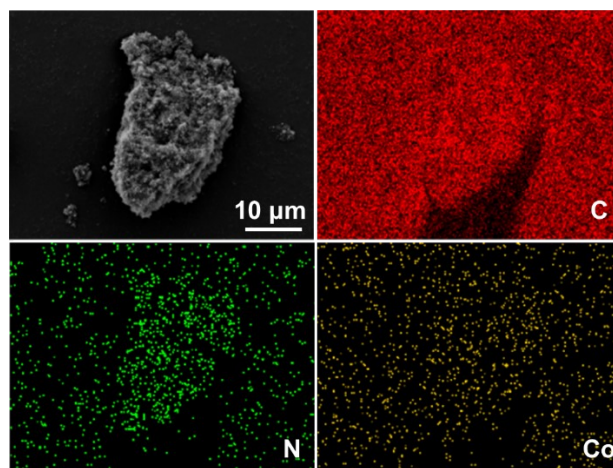

**Figure S23.** SEM and the corresponding EDS mapping images of PZ-POP-Co after *i-t* test.

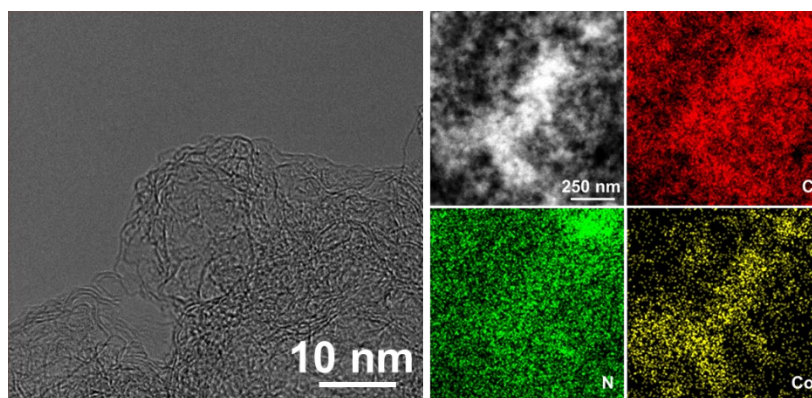

**Figure S24.** TEM and the corresponding EDS mapping images of PZ-POP-Co after *i-t* test.

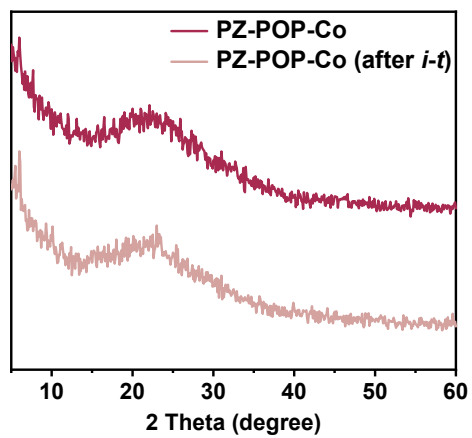

**Figure S25.** XRD patterns of PZ-POP-Co before and after *i-t* test.

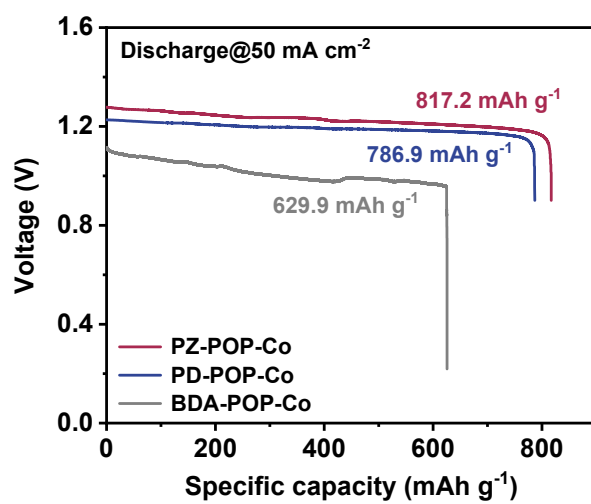

**Figure S26.** Galvanostatic discharge curves at the current density of 50 mA cm<sup>-2</sup> of X-POP-Co.

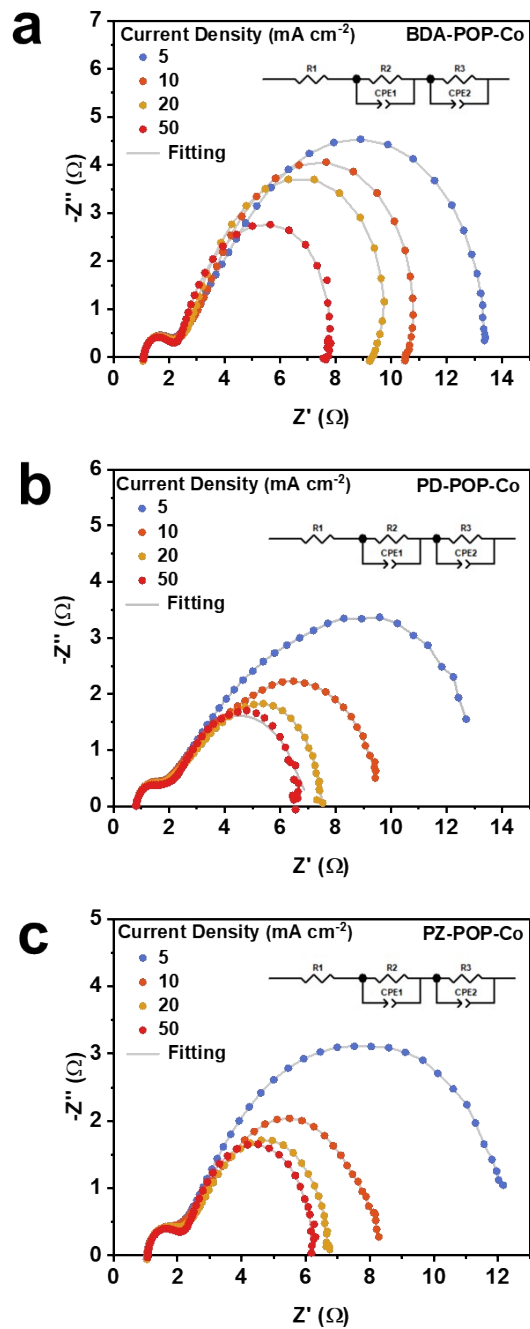

**Figure S27.** Nyquist plots for liquid ZABs based on **a** BDA-POP-Co, **b** PD-POP-Co and **c** PZ-POP-Co under different discharge current densities.

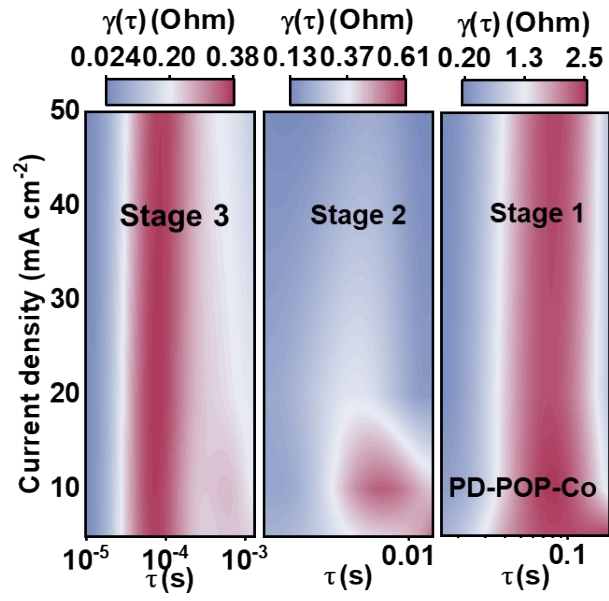

**Figure S28.** Contour mappings of DRT results of liquid ZAB based on PD-POP-Co.

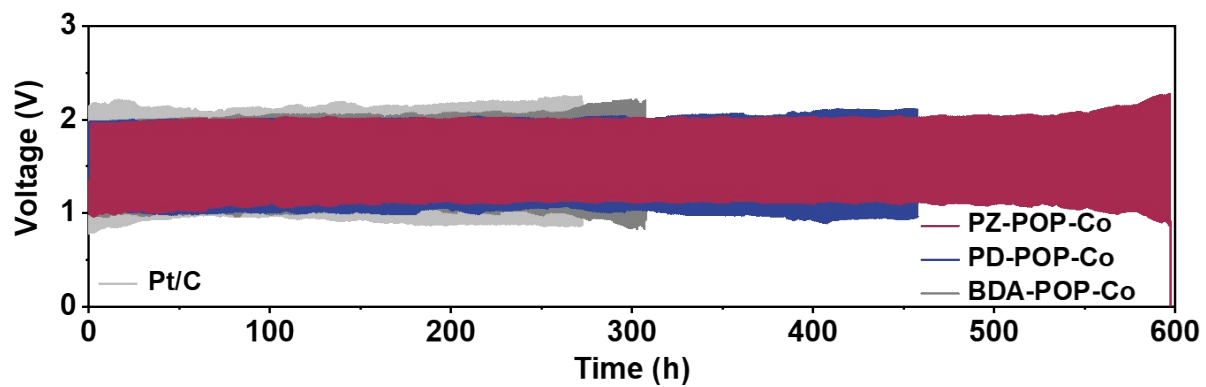

**Figure S29.** Galvanostatic charge/discharge cycling profiles at  $20 \text{ mA cm}^{-2}$  of ZABs with BDA-POP-Co +  $\text{RuO}_2$ , PD-POP-Co +  $\text{RuO}_2$ , PZ-POP-Co +  $\text{RuO}_2$  and Pt/C +  $\text{RuO}_2$  as cathode catalysts at room temperature ( $\sim 25 \text{ }^\circ\text{C}$ ).

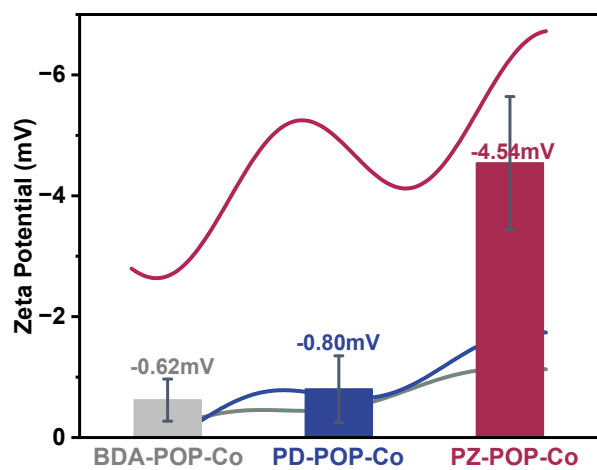

**Figure S30.** Zeta potential of X-POP-Co.

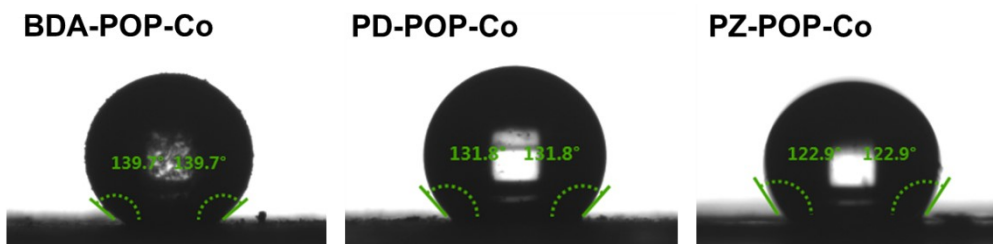

**Figure S31.** Water contact angles for X-POP-Co.

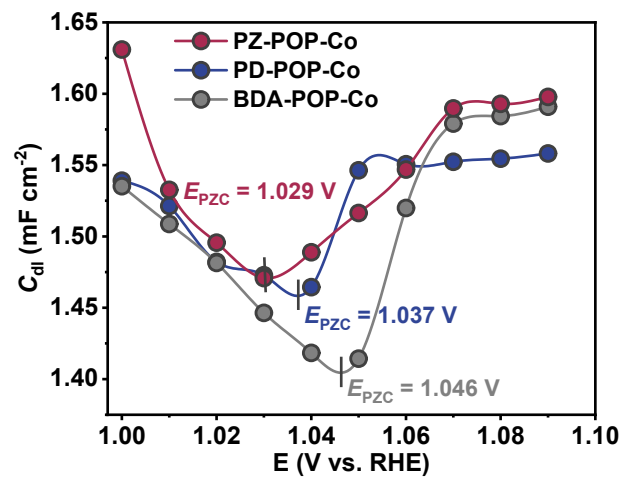

**Figure S32.**  $C_{dl}$  measured in 0.1 M KOH for X-POP-Co.

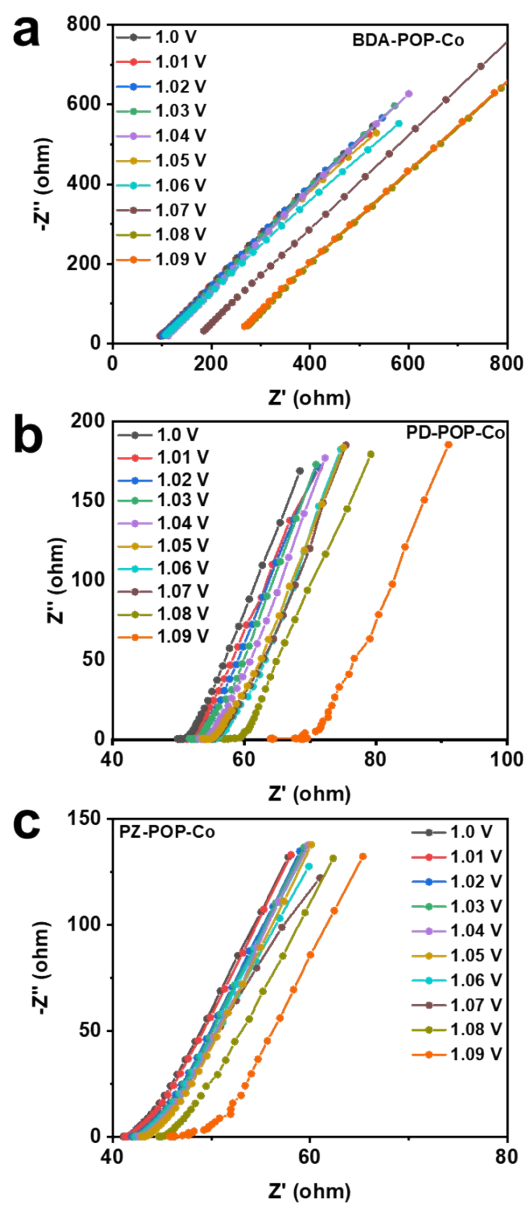

**Figure S33.** The Nyquist plots of **a** BDA-POP-Co, **b** PD-POP-Co and **c** PZ-POP-Co under different potentials tested in 0.1 M KOH.

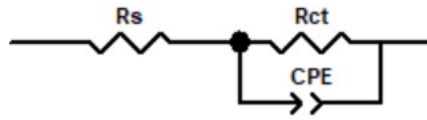

**Figure S34.** The equivalent circuit model, where  $R_s$  is the solution resistance,  $R_{ct}$  is the charge transfer resistance, and CPE is the constant phase element.

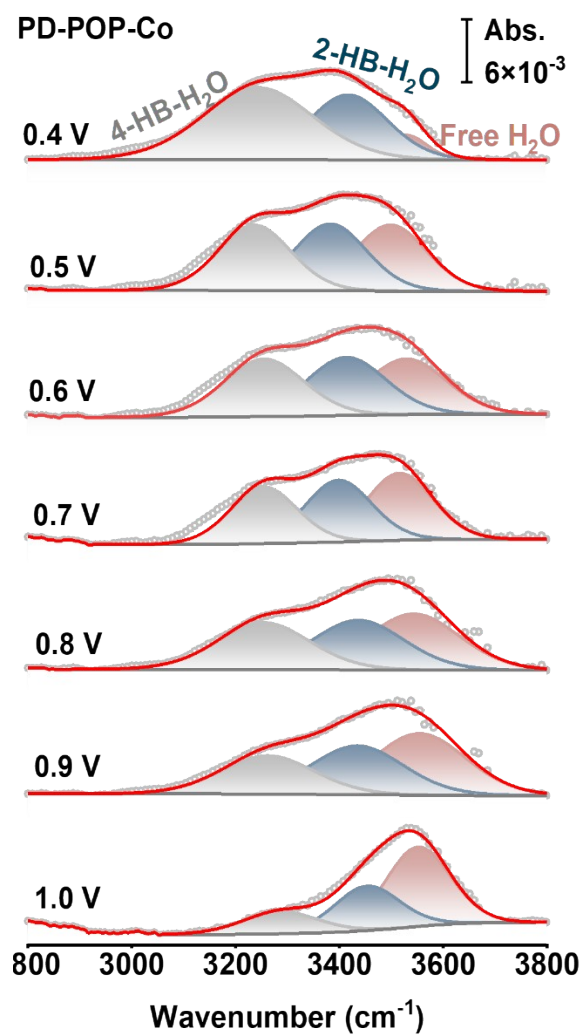

**Figure S35.** O-H stretching of interfacial water from *in situ* ATR-SEIRAS spectra of PD-POP-Co.

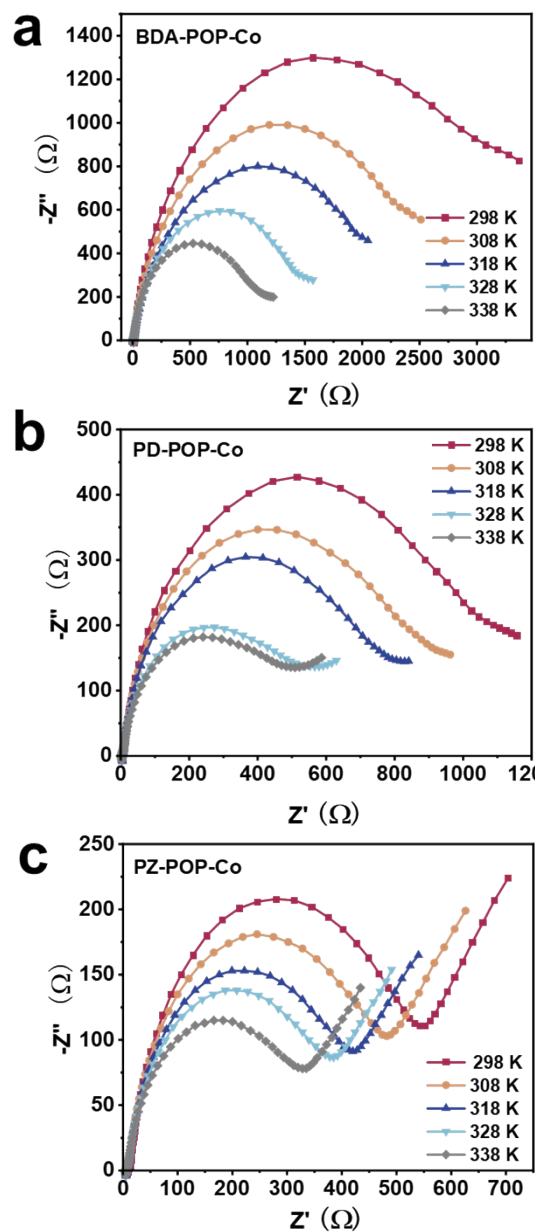

**Figure S36.** Nyquist plots of X-POP-Co measured at different temperatures (98% RH).

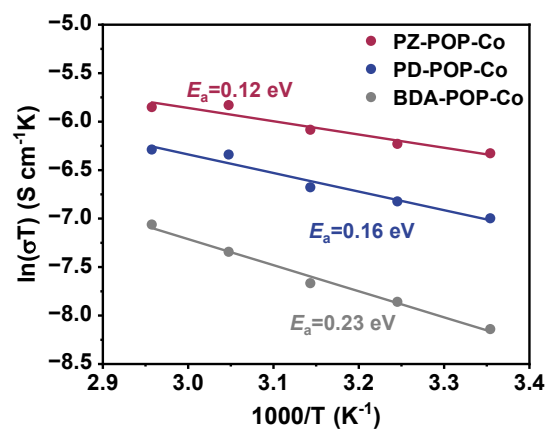

Figure S37. Arrhenius plots of X-POP-Co.

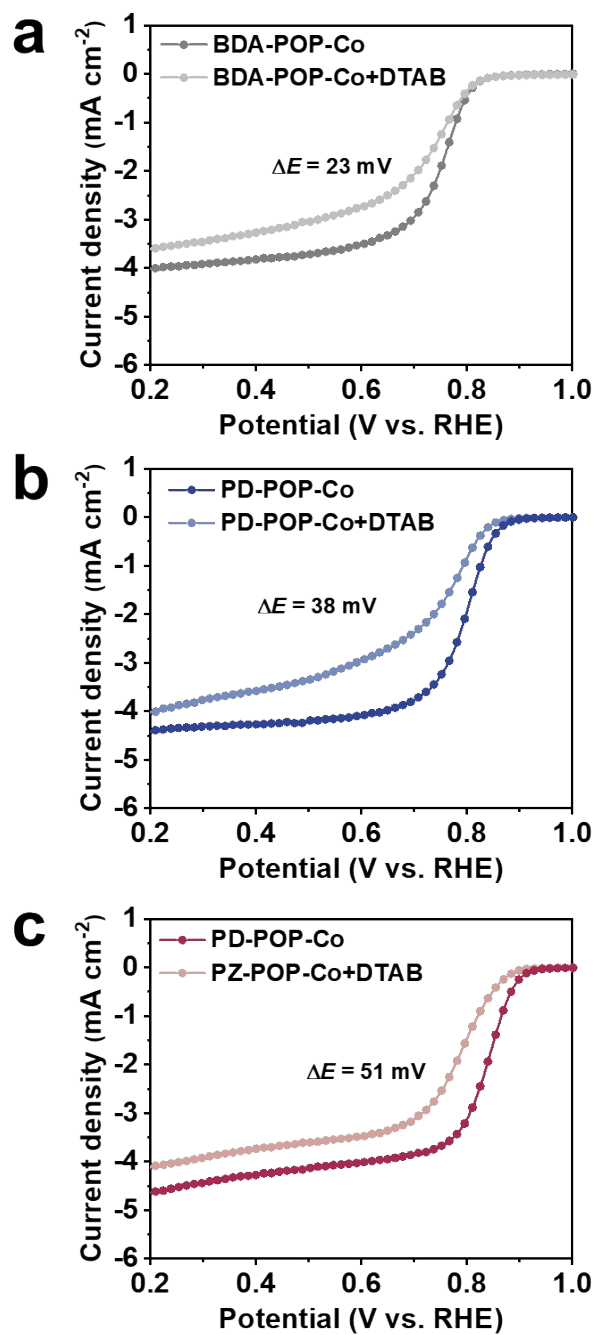

**Figure S38.** ORR polarization curves of X-POP-Co with and without 0.2 mM DTAB.

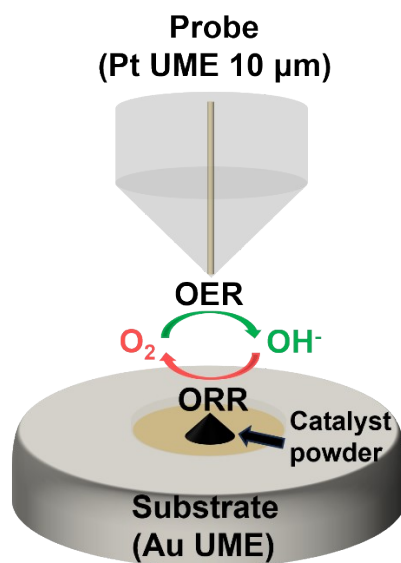

**Figure S39.** Setup used for a typical SECM investigation in the TG/SC mode. OER, oxygen evolution reaction.

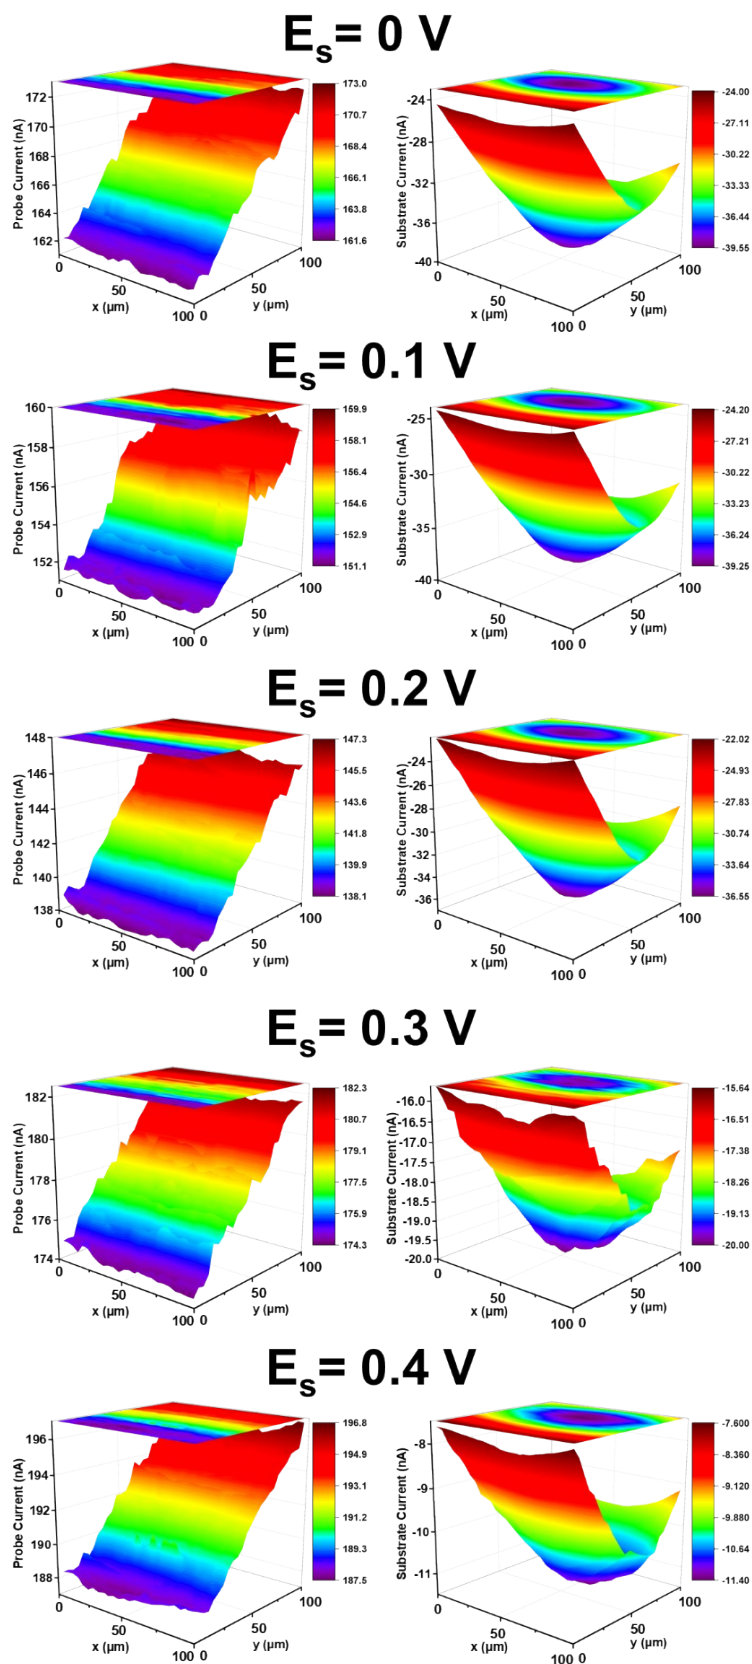

**Figure S40.** SECM scanning images of BDA -POP-Co at substrate potential of 0.0-0.4 V (vs. RHE). The probe is set at a certain potential of 1.8146 V (vs. RHE).

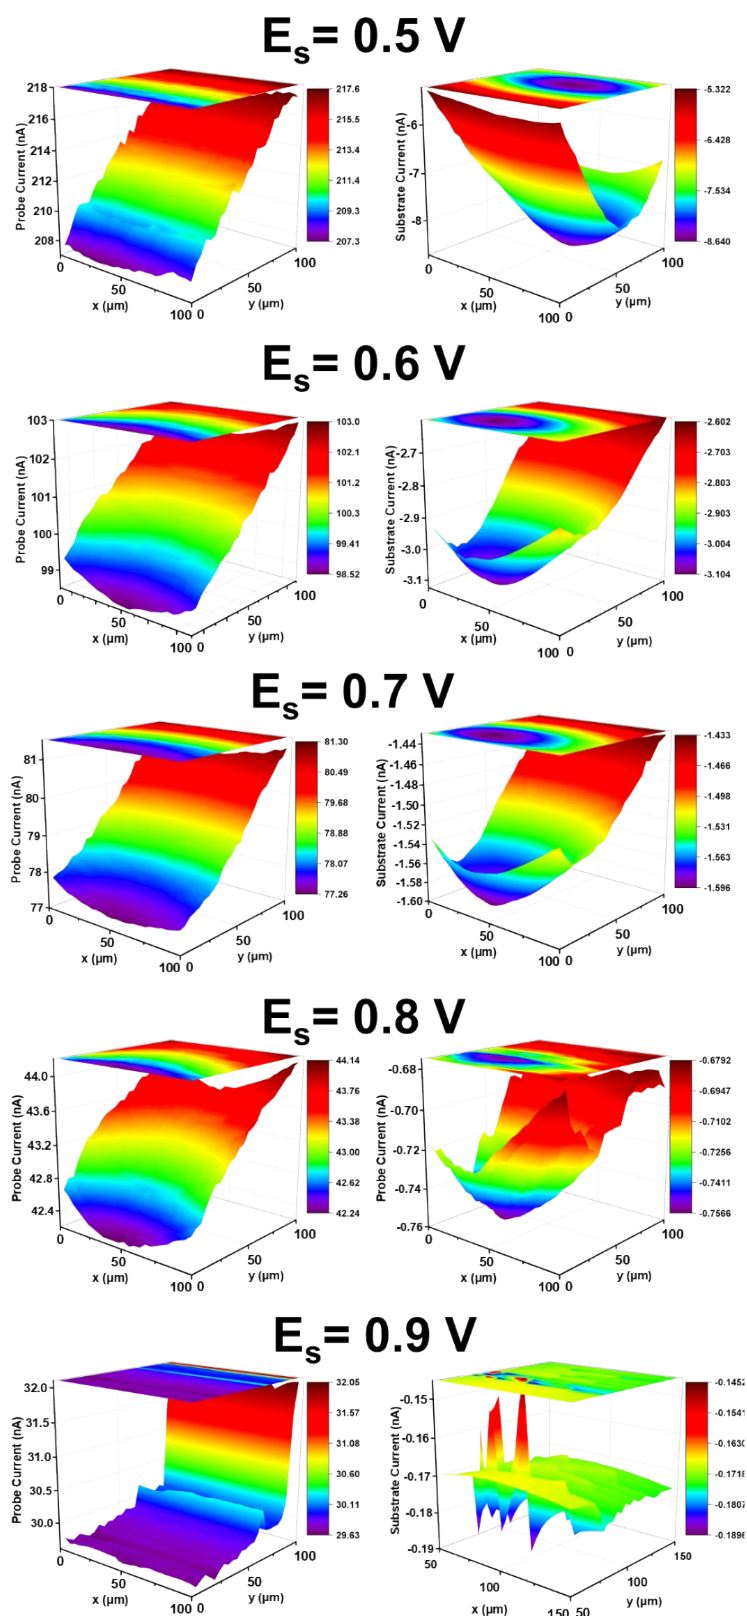

**Figure S41.** SECM scanning images of BDA-POP-Co at substrate potential of 0.5-0.9 V (vs. RHE). The probe is set at a certain potential of 1.8146 V (vs. RHE).

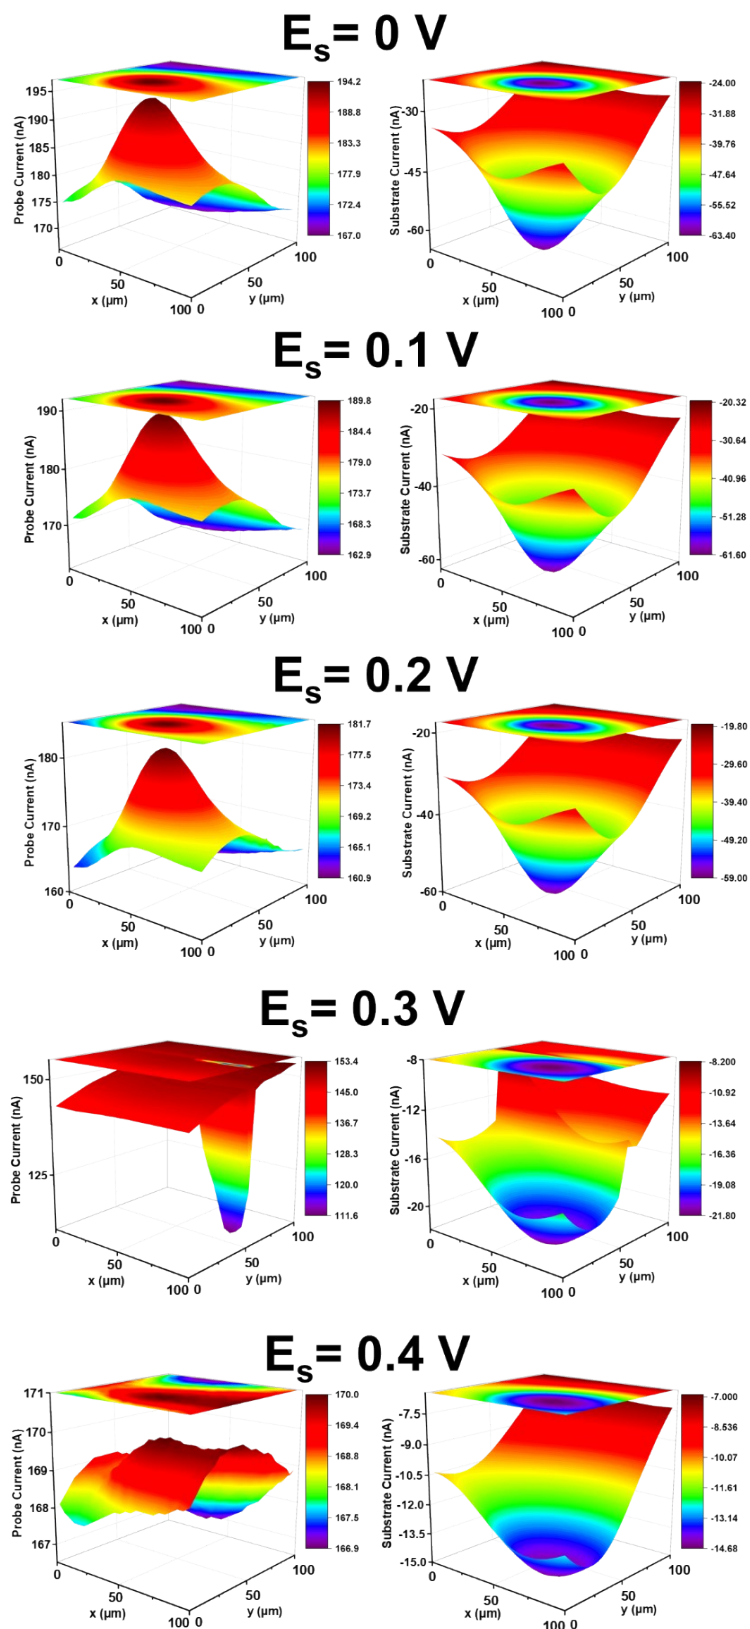

**Figure S42.** SECM scanning images of PD-POP-Co at substrate potential of 0.0-0.4 V (vs. RHE). The probe is set at a certain potential of 1.8146 V (vs. RHE).

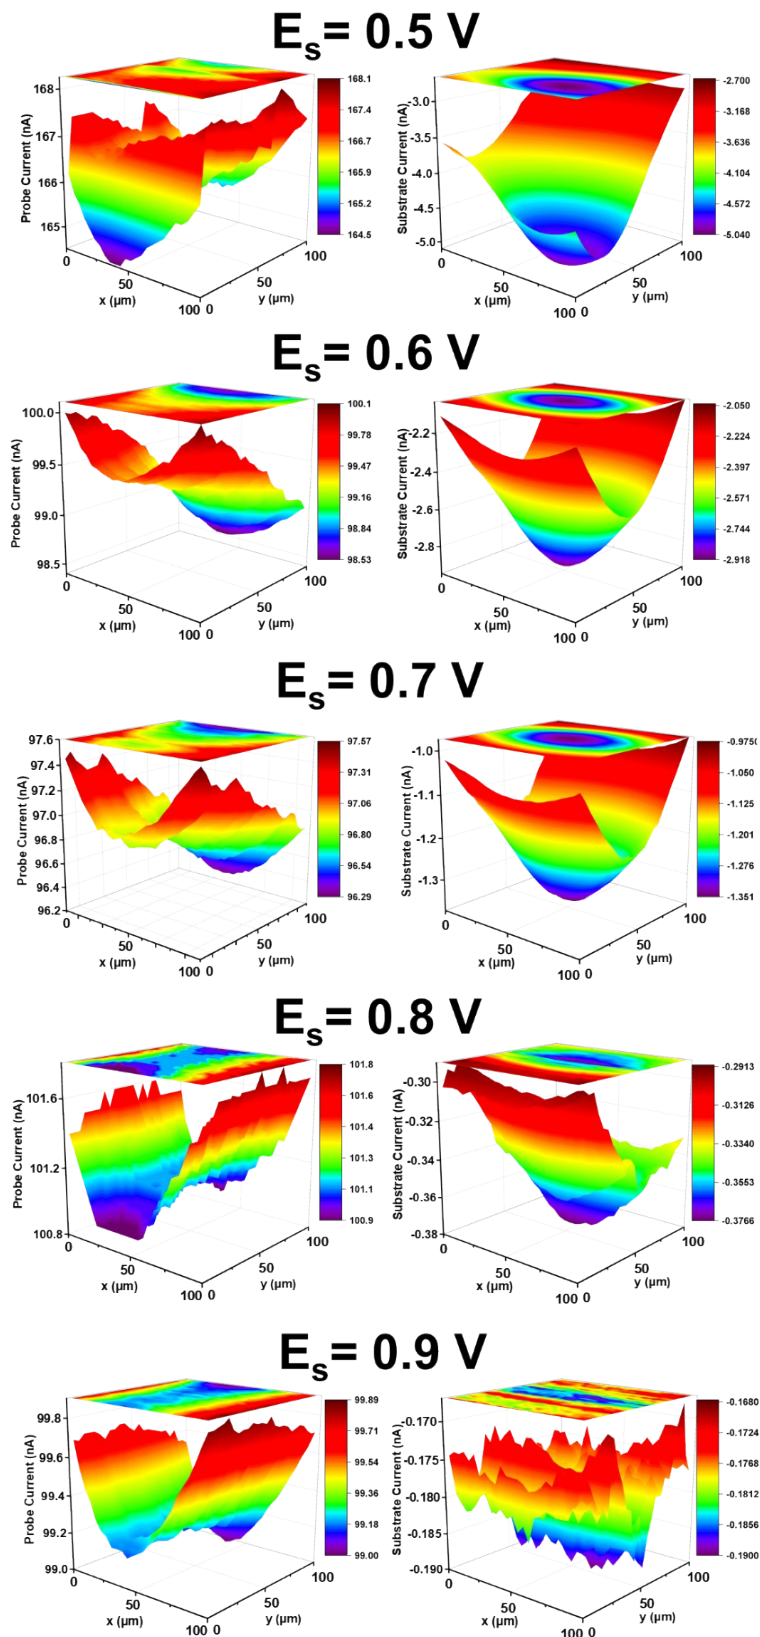

**Figure S43.** SECM scanning images of PD-POP-Co at substrate potential of 0.5-0.9 V (vs. RHE). The probe is set at a certain potential of 1.8146 V (vs. RHE).

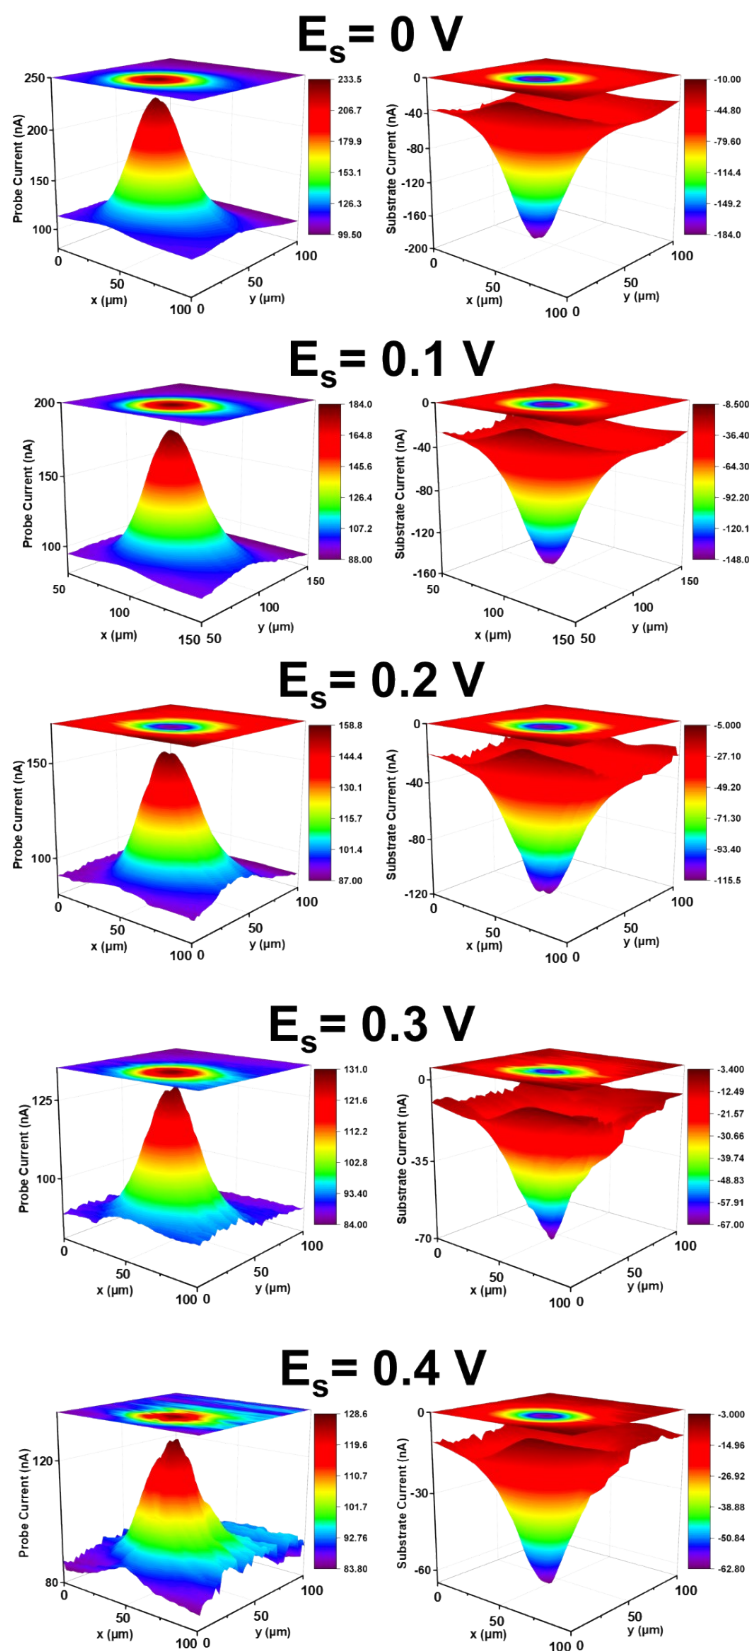

**Figure S44.** SECM scanning images of PZ-POP-Co at substrate potential of 0.0-0.4 V (vs. RHE). The probe is set at a certain potential of 1.8146 V (vs. RHE).

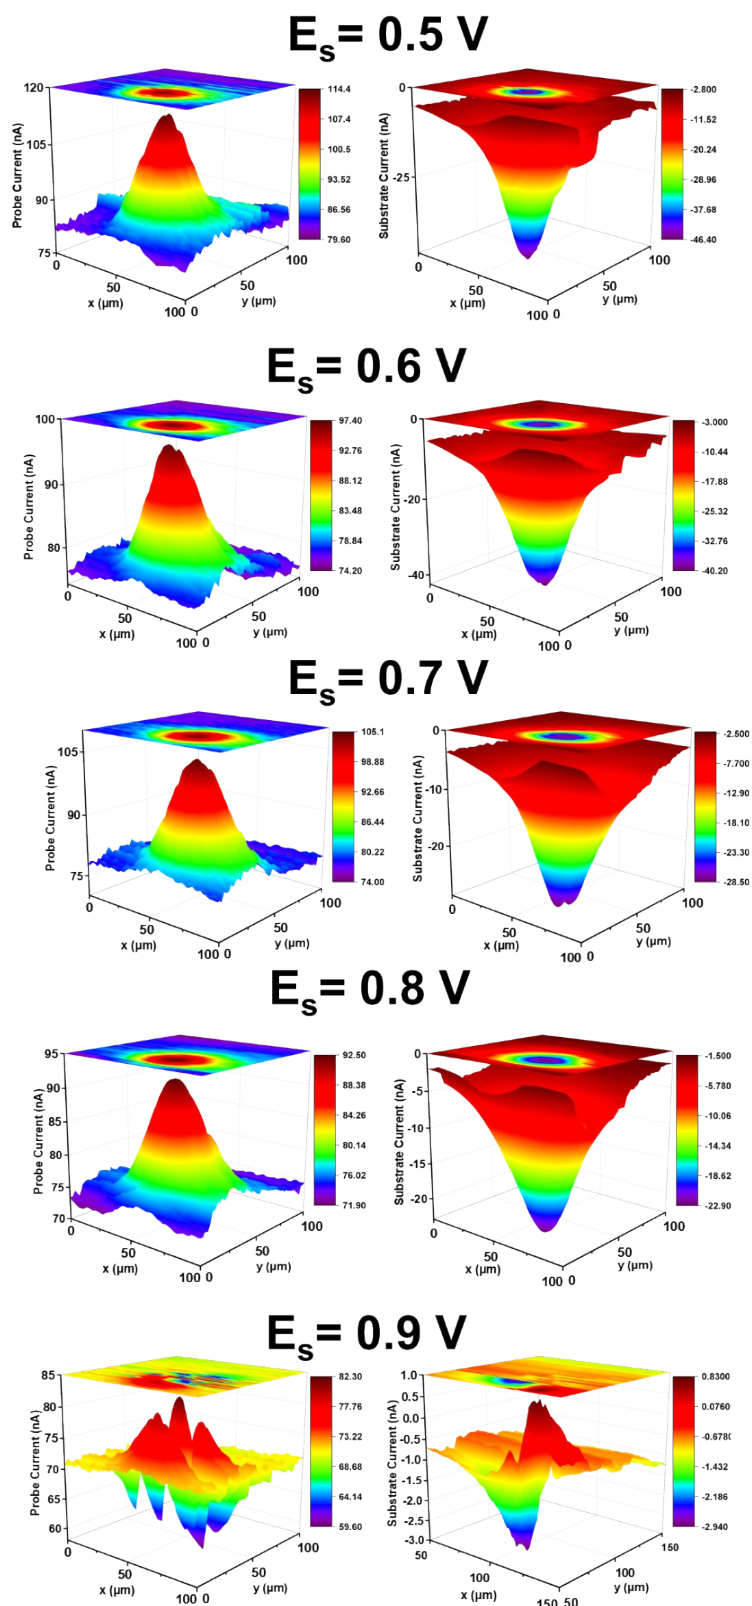

**Figure S45.** SECM scanning images of PZ-POP-Co at substrate potential of 0.5-0.9 V (vs. RHE). The probe is set at a certain potential of 1.8146 V (vs. RHE).

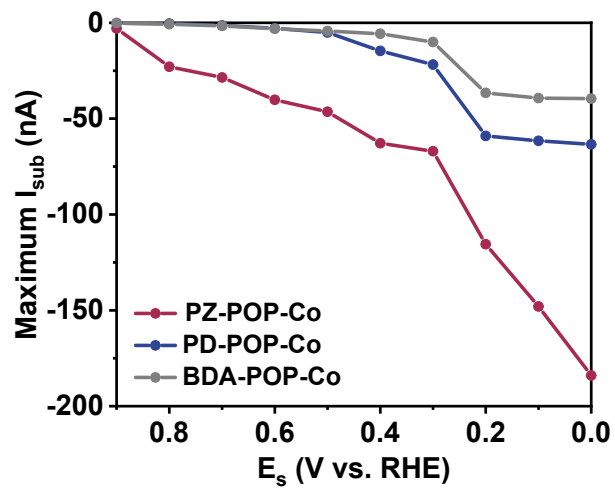

**Figure S46.** Plots of maximum substrate current as functions of substrate potential for SECM results.

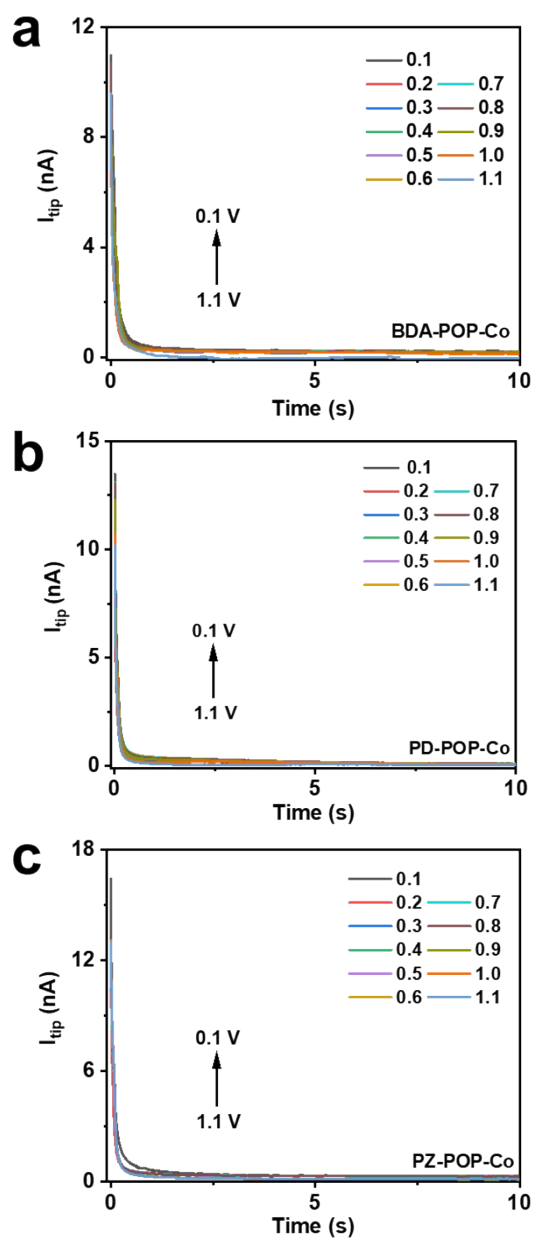

**Figure S47.** Chronoamperometry curves recorded on the tip in SI-SECM measurements of **a** BDA-POP-Co, **b** PD-POP-Co and **c** PZ-POP-Co.

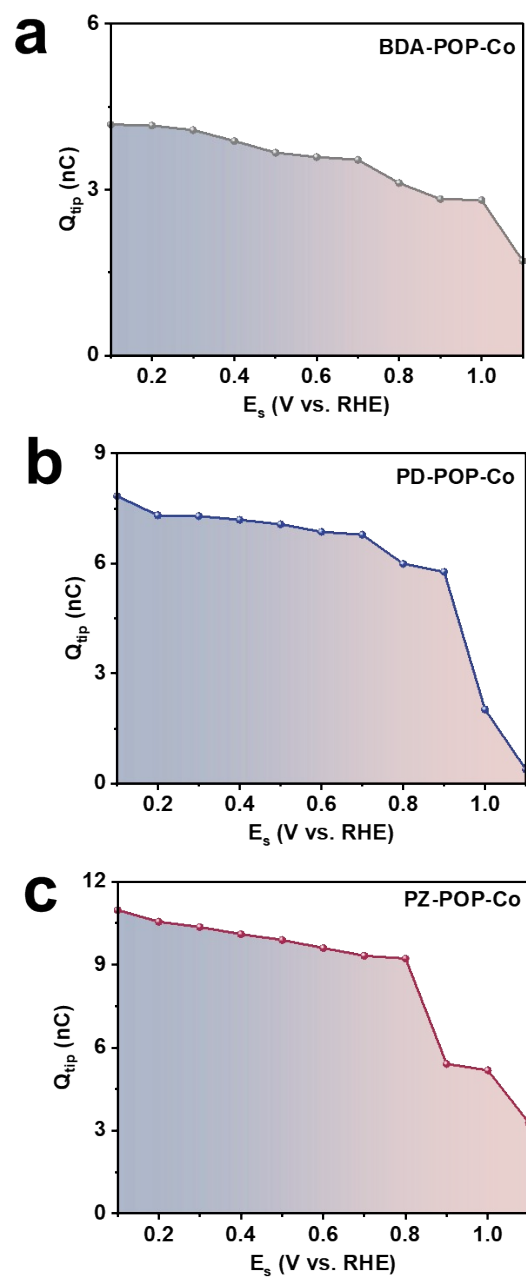

**Figure S48.** Integrated charge with SI-SECM for **a** BDA-POP-Co, **b** PD-POP-Co and **c** PZ-POP-Co.

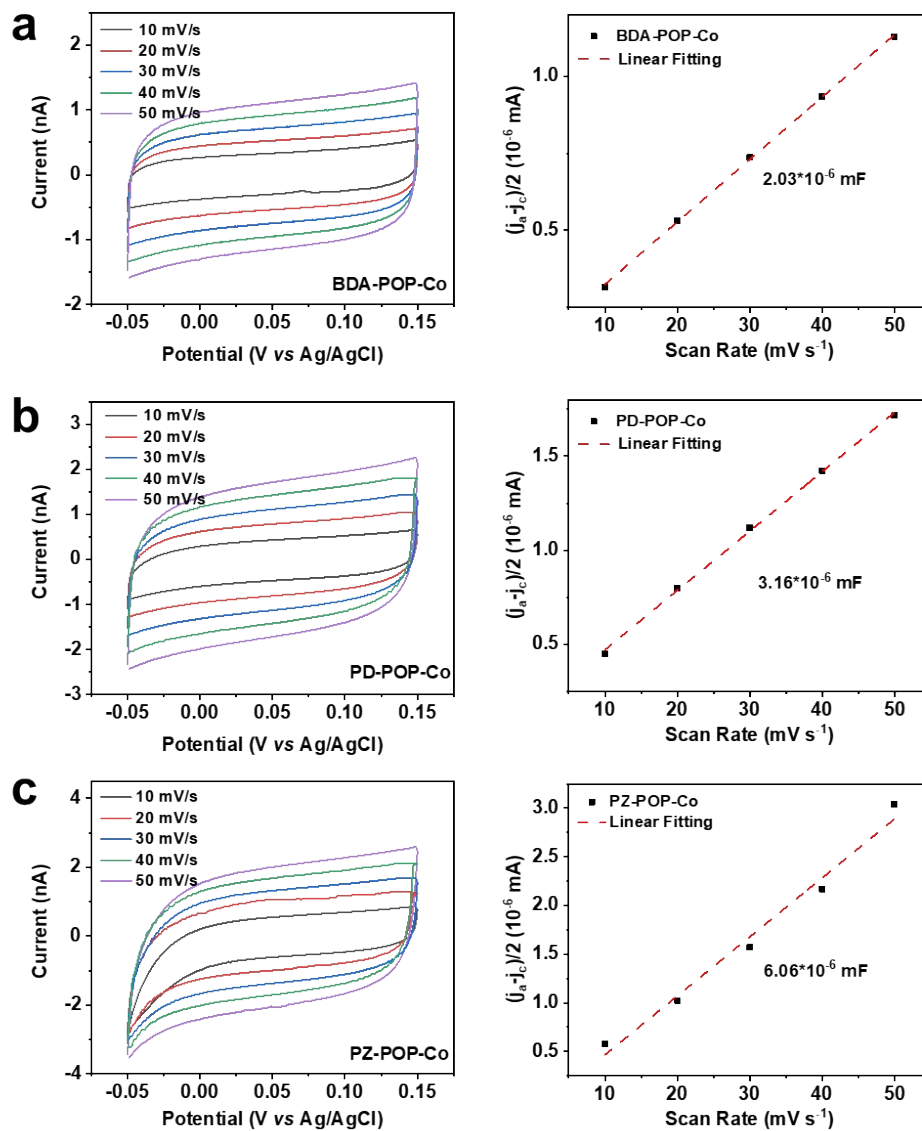

**Figure S49.** CV curves at different scan rates (left) and corresponding fitting results of  $C_{dl}$  (right) for **a** BDA-POP-Co, **b** PD-POP-Co and **c** PZ-POP-Co.

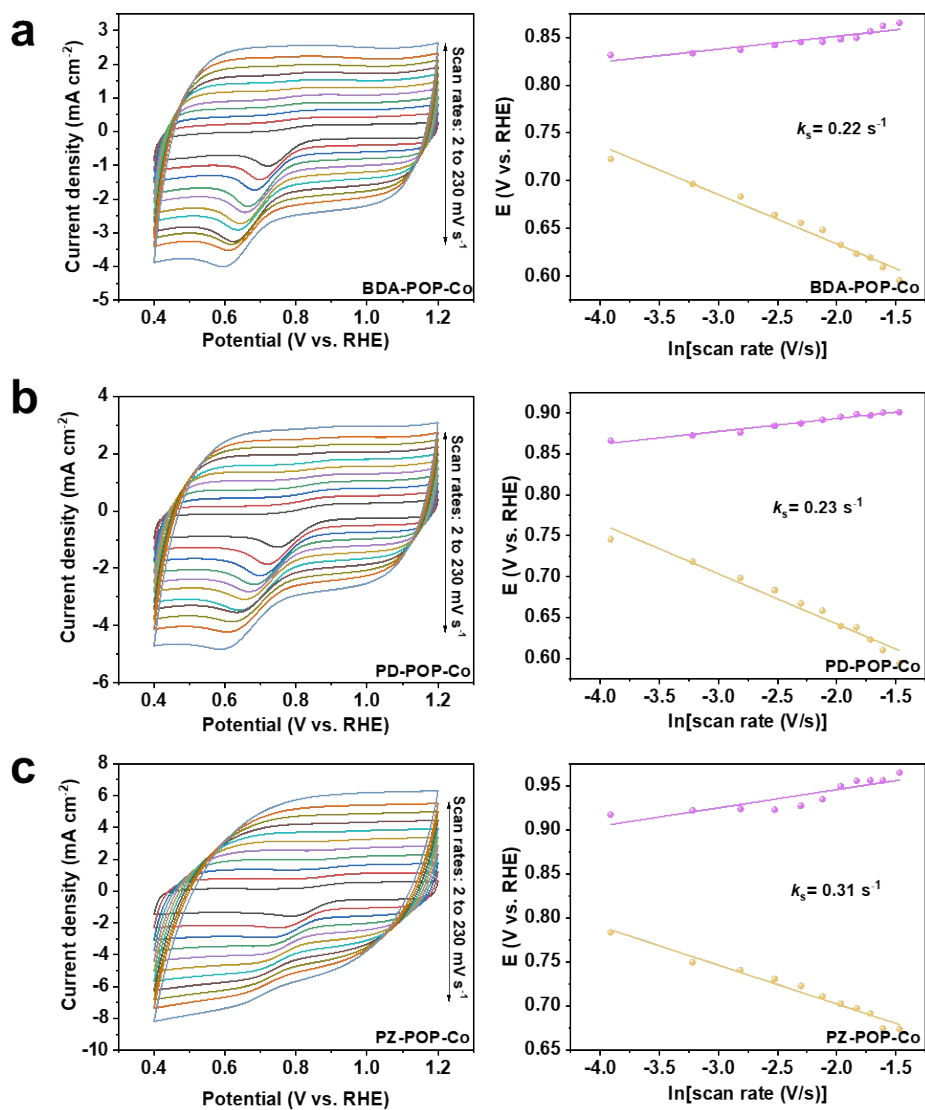

**Figure S50.** CV curves (left column) of **a** BDA-POP-Co, **b** PD-POP-Co and **c** PZ-POP-Co conducted in 1 mM  $\text{K}_3\text{Fe}(\text{CN})_6/0.1 \text{ M KCl}$  with various scan rates, and the corresponding Laviron analytical results (right column).

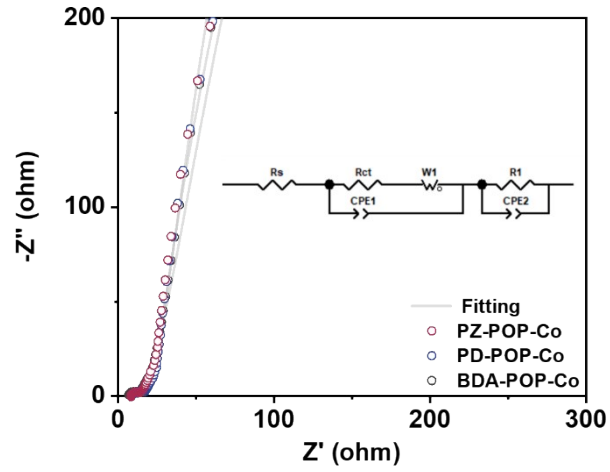

**Figure S51.** The Nyquist plots of X-POP-Co. Inset: the equivalent circuit for the semicircle part. The equivalent circuit model comprised solution resistance ( $R_s$ ), charge transfer resistance ( $R_{ct}$ ), constant phase element (CPE), and Warburg resistance for ionic diffusion (W).

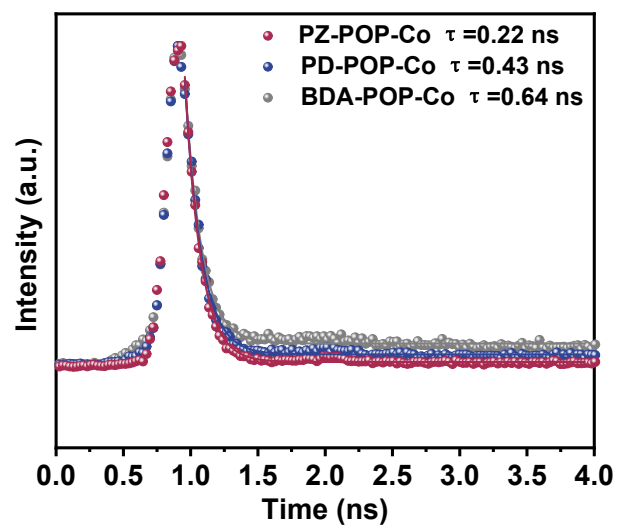

**Figure S52.** Fluorescent quantum lifetimes of X-POP-Co.

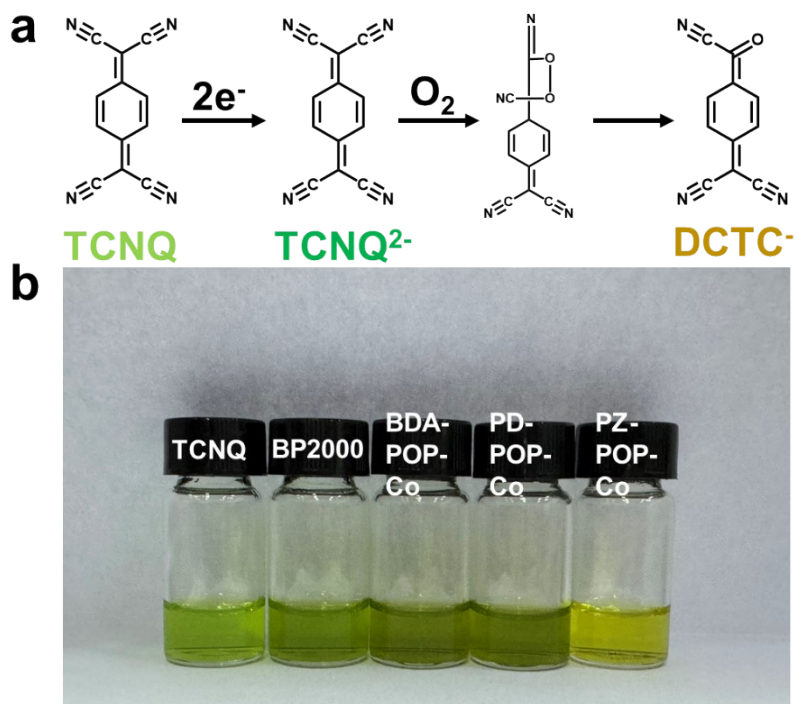

**Figure S53.** (a) Electron transfer reaction of TCNQ. (b) Optical image of TCNQ solutions in acetonitrile and with BP2000, BDA-POP-Co, PD-POP-Co, and PZ-POP-Co.

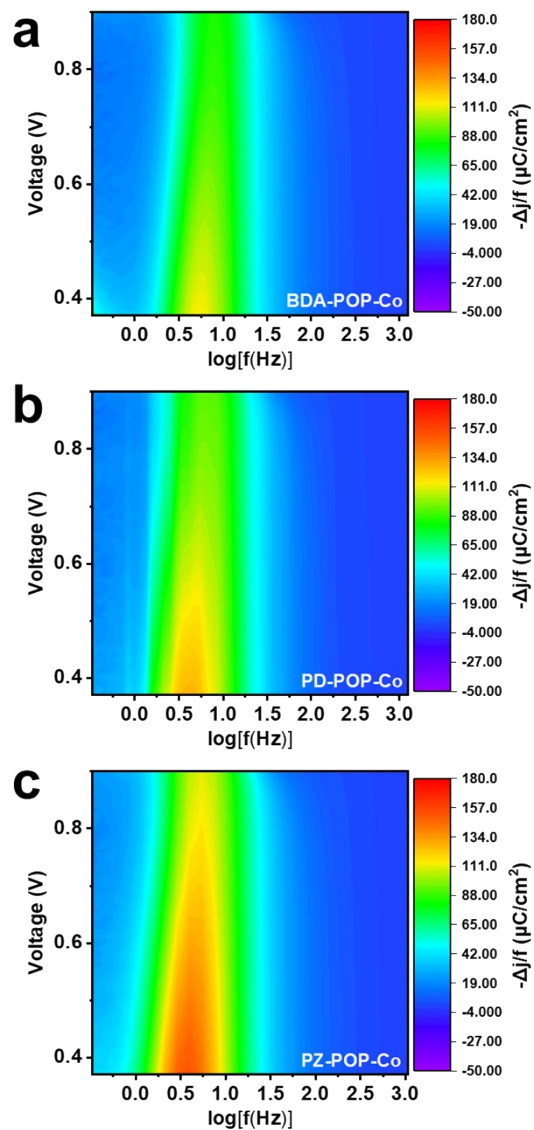

**Figure S54.** VF-SWV colormaps of **a** BDA-POP-Co, **b** PD-POP-Co and **c** PZ-POP-Co catalysts.

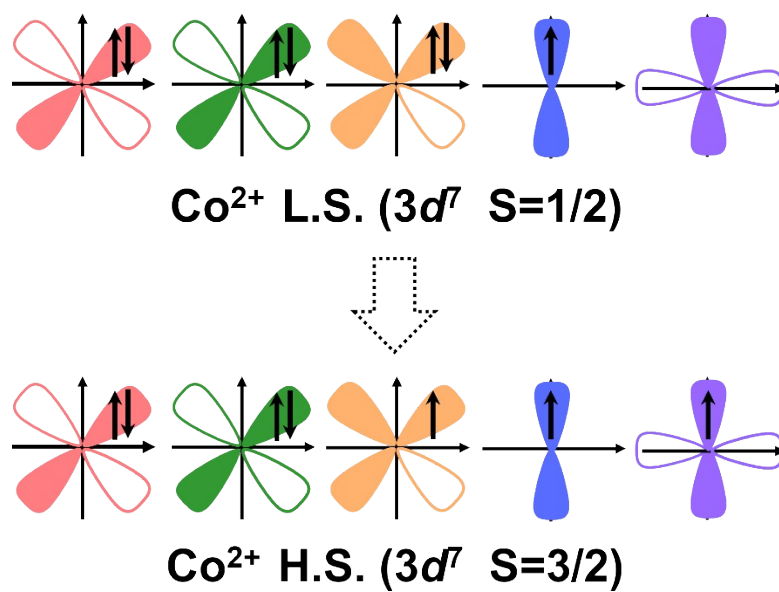

**Figure S55.** *3d* electron occupations in the L.S. and H.S. states of  $\text{Co}^{2+}$  in X-POP-Co.

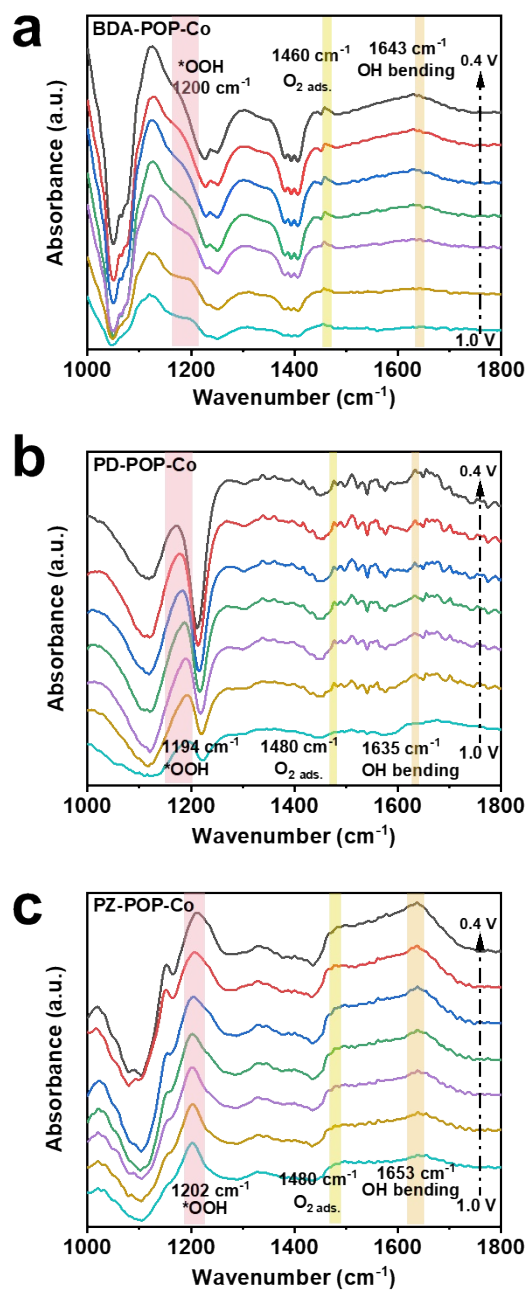

**Figure S56.** *In situ* ATR-SEIRAS spectra of **a** BDA-POP-Co, **b** PD-POP-Co and **c** PZ-POP-Co for ORR from 1.0 V to 0.4 V.

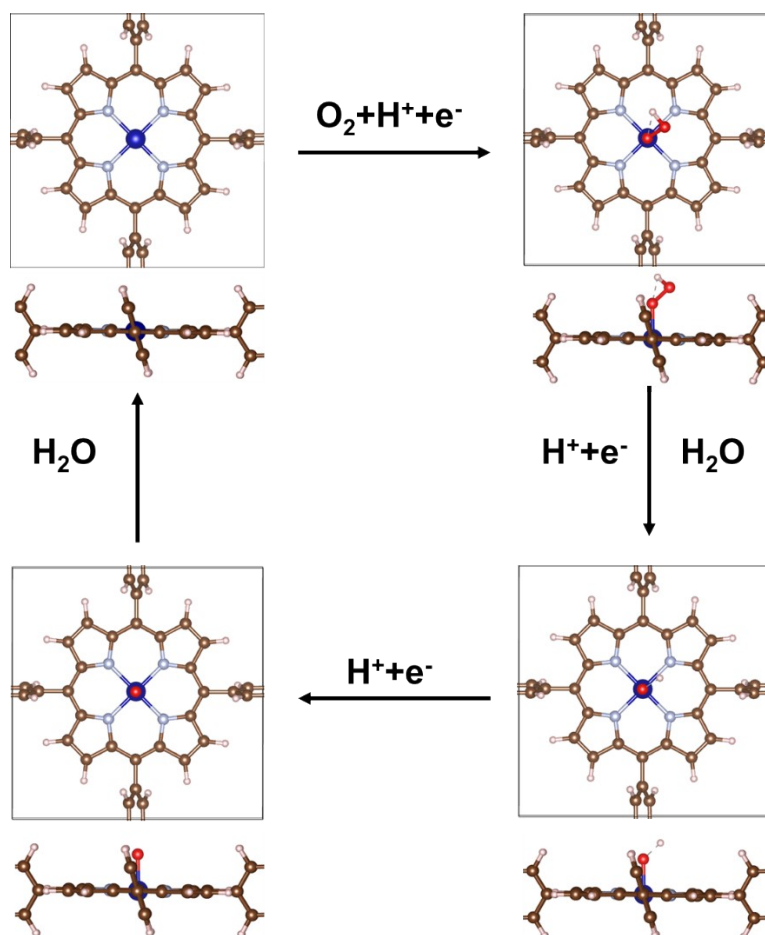

**Figure S57.** Side and top view of optimized adsorption configurations of each intermediate during ORR on Co-N<sub>4</sub> for BDA-POP-Co.

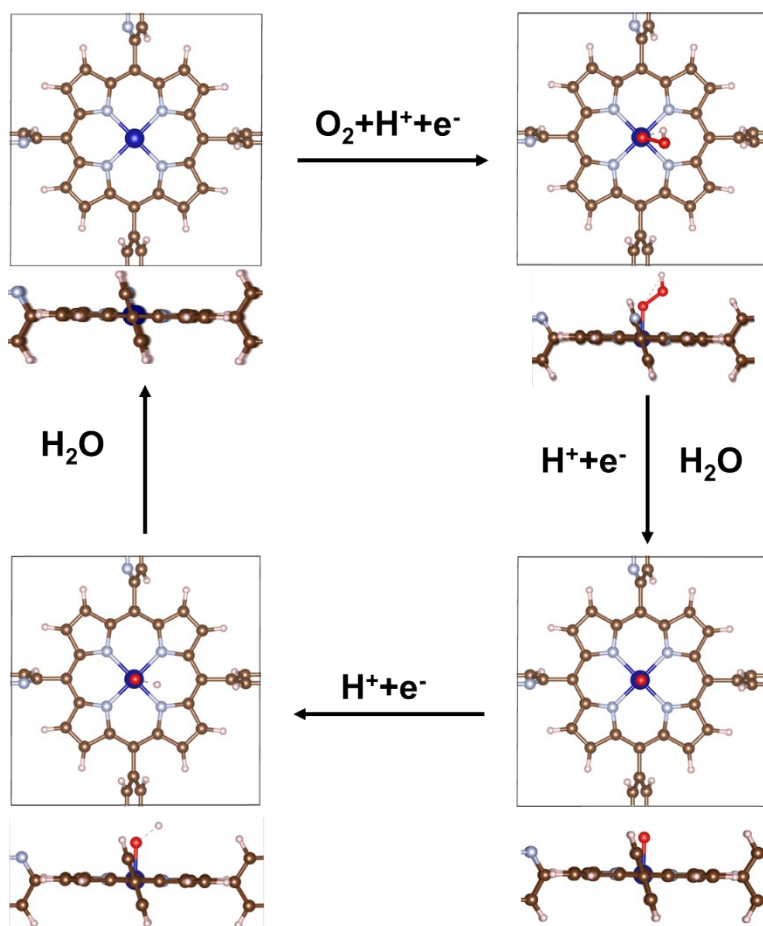

**Figure S58.** Side and top view of optimized adsorption configurations of each intermediate during ORR on Co-N<sub>4</sub> for PD-POP-Co.

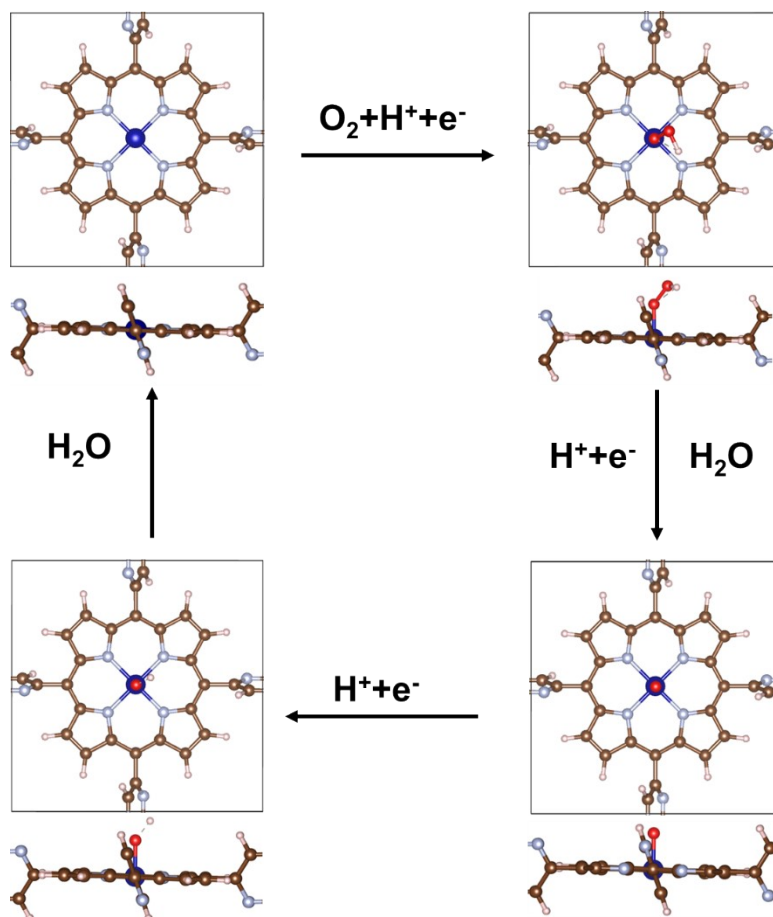

**Figure S59.** Top view of optimized adsorption configurations of each intermediate during ORR on Co-N<sub>4</sub> for PZ-POP-Co.

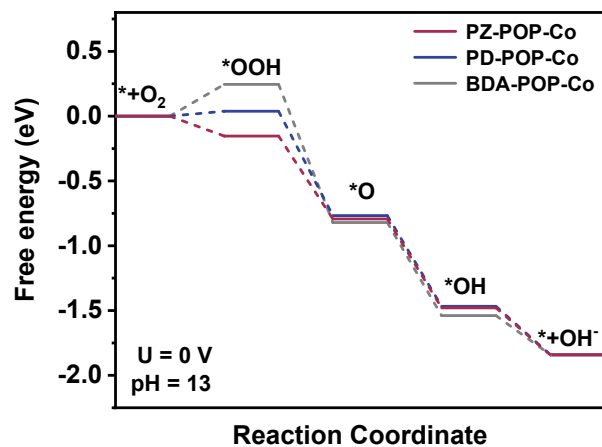

**Figure S60.** The Gibbs free-energy diagram of X-POP-Co analogs at  $U = 0$  V.

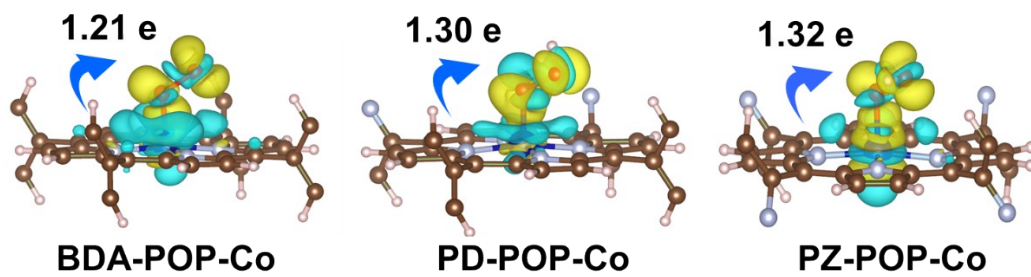

**Figure S61.** Charge density difference for X-POP-Co analogs at  $U = 0$  V, pH=13.

**Table S1.** Summary of the Brunauer-Emmett-Teller (BET) specific surface area for X-POP-Co.

| Sample     | BET specific surface area (m <sup>2</sup> g <sup>-1</sup> ) |
|------------|-------------------------------------------------------------|
| PZ-POP-Co  | 1069.8                                                      |
| PD-POP-Co  | 1042.3                                                      |
| BDA-POP-Co | 935.2                                                       |

**Table S2.** Elements contents of X-POP-Co based on XPS and EDS survey.

| Sample     | Method | Relative amounts of elements (at.%) |       |       |      |
|------------|--------|-------------------------------------|-------|-------|------|
|            |        | C                                   | N     | O     | Co   |
| PZ-POP-Co  | XPS    | 74.26                               | 12.76 | 12.47 | 0.51 |
|            | EDS    | 78.69                               | 12.34 | 7.92  | 1.05 |
| PD-POP-Co  | XPS    | 75.79                               | 10.21 | 13.54 | 0.46 |
|            | EDS    | 81.21                               | 10.61 | 7.35  | 0.83 |
| BDA-POP-Co | XPS    | 76.79                               | 9.59  | 13.2  | 0.42 |
|            | EDS    | 81.86                               | 9.27  | 8.08  | 0.79 |

**Table S3.** Comparison of the N species of X-POP-Co.

| Sample     | Relative amounts of N species (%) |             |             |
|------------|-----------------------------------|-------------|-------------|
|            | Pyrrolic N                        | Pyridinic N | Pyrazinic N |
| BDA-POP-Co | 85.56                             | 14.44       | N.A.        |
| PD-POP-Co  | 77.53                             | 22.47       | N.A.        |
| PZ-POP-Co  | 68.17                             | 13.21       | 18.80       |

**Table S4.** Summary of EIS analysis of liquid ZABs based on X-POP-Co catalysts.

| Current density<br>(mA cm <sup>-2</sup> ) |               | 5      | 10     | 20     | 25     |
|-------------------------------------------|---------------|--------|--------|--------|--------|
| PZ-POP-Co                                 | $R_1(\Omega)$ | 0.7840 | 0.7864 | 0.7703 | 0.7713 |
|                                           | $R_2(\Omega)$ | 0.9972 | 1.009  | 1.293  | 1.293  |
|                                           | $R_3(\Omega)$ | 11.08  | 6.427  | 4.452  | 4.088  |
| PD-POP-Co                                 | $R_1(\Omega)$ | 1.025  | 1.025  | 1.009  | 1.027  |
|                                           | $R_2(\Omega)$ | 1.023  | 1.131  | 1.395  | 1.246  |
|                                           | $R_3(\Omega)$ | 14.16  | 8.702  | 5.881  | 5.12   |
| BDA-POP-Co                                | $R_1(\Omega)$ | 0.9740 | 0.8369 | 0.9237 | 1.013  |
|                                           | $R_2(\Omega)$ | 1.71   | 2.441  | 1.919  | 1.373  |
|                                           | $R_3(\Omega)$ | 11.44  | 7.641  | 7.044  | 5.942  |

**Table S5.** EIS fitting parameters of PZ-POP-Co in 0.1 M KOH.

| $E$ (V vs RHE) | $R_s$ ( $\Omega$ cm <sup>2</sup> ) | $R_{ct}$ ( $\Omega$ cm <sup>2</sup> ) | $T$ (mF cm <sup>-2</sup> s <sup><math>\phi</math>-1</sup> ) | $P$     | $C_{dl}$ (mF cm <sup>-2</sup> ) |
|----------------|------------------------------------|---------------------------------------|-------------------------------------------------------------|---------|---------------------------------|
| 1              | 42.8                               | 8057                                  | 0.0018893                                                   | 0.94488 | 1.631                           |
| 1.01           | 43.38                              | 22108                                 | 0.0018304                                                   | 0.93455 | 1.533                           |
| 1.02           | 45.53                              | 75453                                 | 0.0017729                                                   | 0.93672 | 1.496                           |
| 1.03           | 47.52                              | 79656                                 | 0.0017758                                                   | 0.92919 | 1.471                           |
| 1.04           | 41.85                              | 41418                                 | 0.0017734                                                   | 0.93702 | 1.489                           |
| 1.05           | 42.03                              | 58781                                 | 0.001752                                                    | 0.94756 | 1.516                           |
| 1.06           | 42.75                              | 89804                                 | 0.0017728                                                   | 0.94981 | 1.547                           |
| 1.07           | 42.96                              | 107922                                | 0.0018189                                                   | 0.94983 | 1.590                           |
| 1.08           | 43.2                               | 140790                                | 0.0018254                                                   | 0.9491  | 1.593                           |
| 1.09           | 43.46                              | 180970                                | 0.0018267                                                   | 0.94981 | 1.598                           |

**Table S6.** EIS fitting parameters of PD-POP-Co in 0.1 M KOH.

| $E$ (V vs RHE) | $R_s$ ( $\Omega$ cm <sup>2</sup> ) | $R_{ct}$ ( $\Omega$ cm <sup>2</sup> ) | $T$ (mF cm <sup>-2</sup> s $\phi^{-1}$ ) | $P$     | $C_{dl}$ (mF cm <sup>-2</sup> ) |
|----------------|------------------------------------|---------------------------------------|------------------------------------------|---------|---------------------------------|
| 1              | 58.72                              | 24818                                 | 0.00188745                               | 0.9152  | 1.539                           |
| 1.01           | 68.52                              | 25544                                 | 0.00186087                               | 0.91101 | 1.521                           |
| 1.02           | 51.77                              | 48363                                 | 0.00184378                               | 0.915   | 1.482                           |
| 1.03           | 51.18                              | 58259                                 | 0.00181349                               | 0.91954 | 1.472                           |
| 1.04           | 53.08                              | 69363                                 | 0.00180208                               | 0.91881 | 1.464                           |
| 1.05           | 51.42                              | 80345                                 | 0.00188022                               | 0.9228  | 1.546                           |
| 1.06           | 53.17                              | 102690                                | 0.001890037                              | 0.92069 | 1.551                           |
| 1.07           | 54.4                               | 398430                                | 0.00189688                               | 0.9189  | 1.552                           |
| 1.08           | 56.04                              | 336960                                | 0.00189901                               | 0.91799 | 1.554                           |
| 1.09           | 55.55                              | 189730                                | 0.00189709                               | 0.91957 | 1.558                           |

**Table S7.** EIS fitting parameters of BDA-POP-Co in 0.1 M KOH.

| $E$ (V vs RHE) | $R_s$ ( $\Omega$ cm <sup>2</sup> ) | $R_{ct}$ ( $\Omega$ cm <sup>2</sup> ) | $T$ (mF cm <sup>-2</sup> s <sup><math>\phi</math>-1</sup> ) | $P$     | $C_{dl}$ (mF cm <sup>-2</sup> ) |
|----------------|------------------------------------|---------------------------------------|-------------------------------------------------------------|---------|---------------------------------|
| 1              | 73.97                              | 24180                                 | 0.00182847                                                  | 0.91976 | 1.535                           |
| 1.01           | 73.6                               | 23587                                 | 0.00179993                                                  | 0.91982 | 1.509                           |
| 1.02           | 71.12                              | 24522                                 | 0.00177441                                                  | 0.91992 | 1.481                           |
| 1.03           | 82.13                              | 22208                                 | 0.00176123                                                  | 0.90773 | 1.446                           |
| 1.04           | 87.49                              | 23929                                 | 0.00172119                                                  | 0.90744 | 1.418                           |
| 1.05           | 95.7                               | 21923                                 | 0.00172364                                                  | 0.90133 | 1.414                           |
| 1.06           | 161.5                              | 28275                                 | 0.00172135                                                  | 0.91176 | 1.519                           |
| 1.07           | 238                                | 39467                                 | 0.00173363                                                  | 0.90516 | 1.579                           |
| 1.08           | 235                                | 42264                                 | 0.00172255                                                  | 0.91581 | 1.584                           |
| 1.09           | 231                                | 40546                                 | 0.00174005                                                  | 0.91099 | 1.590                           |

**Table S8.** Relative proportions of 4-HB-H<sub>2</sub>O of X-POP-Co.

| <i>E</i> (V vs RHE) | PZ-POP-Co | PD-POP-Co | BDA-POP-Co |
|---------------------|-----------|-----------|------------|
| 0.4                 | 37.86     | 48.34     | 22.06      |
| 0.5                 | 35.99     | 32.9      | 21.76      |
| 0.6                 | 35.52     | 33.58     | 21.48      |
| 0.7                 | 34.13     | 30.5      | 21.23      |
| 0.8                 | 34.99     | 30.71     | 19.67      |
| 0.9                 | 34.76     | 25.82     | 21.54      |
| 1.0                 | 34.63     | 17.13     | 15.95      |

**Table S9.** Relative proportions of 2-HB-H<sub>2</sub>O of X-POP-Co.

| <i>E</i> (V vs RHE) | PZ-POP-Co | PD-POP-Co | BDA-POP-Co |
|---------------------|-----------|-----------|------------|
| 0.4                 | 35.99     | 36.5      | 35.91      |
| 0.5                 | 34.5      | 33.76     | 35.38      |
| 0.6                 | 36.03     | 33.92     | 35.18      |
| 0.7                 | 35.11     | 33.32     | 34.73      |
| 0.8                 | 35.32     | 32.45     | 33.83      |
| 0.9                 | 35.17     | 32.74     | 33.57      |
| 1.0                 | 35.04     | 29.8      | 15.19      |

**Table S10.** Relative proportions of free H<sub>2</sub>O of X-POP-Co.

| <i>E</i> (V vs RHE) | PZ-POP-Co | PD-POP-Co | BDA-POP-Co |
|---------------------|-----------|-----------|------------|
| 0.4                 | 26.15     | 15.15     | 42.03      |
| 0.5                 | 29.51     | 33.74     | 42.86      |
| 0.6                 | 28.45     | 32.5      | 43.34      |
| 0.7                 | 30.76     | 36.18     | 44.04      |
| 0.8                 | 29.68     | 36.84     | 46.5       |
| 0.9                 | 30.07     | 41.44     | 44.89      |
| 1.0                 | 30.33     | 53.07     | 68.86      |

**Table S11.** Summary of EIS analysis of X-POP-Co catalysts.

| Sample     | $R_s$ ( $\Omega$ ) | $R_{ct}$ ( $\Omega$ ) |
|------------|--------------------|-----------------------|
| PZ-POP-Co  | 6.367              | 3.63                  |
| PD-POP-Co  | 8.617              | 5.50                  |
| BDA-POP-Co | 9.044              | 6.84                  |

**Table S12.** Calculated *d*-band center of X-POP-Co.

| Sample     | $\epsilon_d$ spin-up (eV) | $\epsilon_d$ spin-down (eV) | $\epsilon_d$ (eV) |
|------------|---------------------------|-----------------------------|-------------------|
| PZ-POP-Co  | -0.77078                  | -0.18207                    | -0.47642          |
| PD-POP-Co  | -0.90399                  | -0.60324                    | -0.75361          |
| BDA-POP-Co | -0.68963                  | -0.64766                    | -0.65264          |

## References

1. T. H. Wan, M. Saccoccio, C. Chen and F. Ciucci, *Electrochimi. Acta.* 2015, **184**, 483-499.
2. G. Kresse and J. Hafner, *Phys. Rev. B.* 1994, **49**, 14251-14269.
3. G. Kresse and J. Furthmüller, *Phys. Rev. B.* 1996, **54**, 11169-11186.
4. J. P. Perdew and Y. Wang, *Phys. Rev. B.* 1992, **45**, 13244-13249.
